# Supplementary material for: Women’s acceptability of and experience with primary human papillomavirus testing for cervix screening: HPV FOCAL trial cross-sectional online survey results
Source: PubMed Central journal article supplement — BMJ Open. 2021 Oct 7;11(10):e052084. doi: 10.1136/bmjopen-2021-052084 (PMC8499254; doi:10.1136/bmjopen-2021-052084), 2021-10-07
Supplement: bmjopen-2021-052084.draft_revisions.pdf [file bmjopen-2021-052084.draft_revisions.pdf]

# BMJ Open

BMJ Open is committed to open peer review. As part of this commitment we make the peer review history of every article we publish publicly available.

When an article is published we post the peer reviewers' comments and the authors' responses online. We also post the versions of the paper that were used during peer review. These are the versions that the peer review comments apply to.

The versions of the paper that follow are the versions that were submitted during the peer review process. They are not the versions of record or the final published versions. They should not be cited or distributed as the published version of this manuscript.

BMJ Open is an open access journal and the full, final, typeset and author-corrected version of record of the manuscript is available on our site with no access controls, subscription charges or pay-per-view fees (<http://bmjopen.bmj.com>).

If you have any questions on BMJ Open's open peer review process please email [info.bmjopen@bmj.com](mailto:info.bmjopen@bmj.com)

# BMJ Open

## Women's acceptability of and experience with primary human papillomavirus testing for cervix screening: HPV FOCAL trial cross-sectional online survey results

|                               |                                                                                                                                                                                                                                                                                                                                                                                                                                                                                                                                                                                                                                                                                                                                                                                                                                                                                                                                                                                                                                                                                                                                                                                                                                           |
|-------------------------------|-------------------------------------------------------------------------------------------------------------------------------------------------------------------------------------------------------------------------------------------------------------------------------------------------------------------------------------------------------------------------------------------------------------------------------------------------------------------------------------------------------------------------------------------------------------------------------------------------------------------------------------------------------------------------------------------------------------------------------------------------------------------------------------------------------------------------------------------------------------------------------------------------------------------------------------------------------------------------------------------------------------------------------------------------------------------------------------------------------------------------------------------------------------------------------------------------------------------------------------------|
| Journal:                      | <i>BMJ Open</i>                                                                                                                                                                                                                                                                                                                                                                                                                                                                                                                                                                                                                                                                                                                                                                                                                                                                                                                                                                                                                                                                                                                                                                                                                           |
| Manuscript ID                 | bmjopen-2021-052084                                                                                                                                                                                                                                                                                                                                                                                                                                                                                                                                                                                                                                                                                                                                                                                                                                                                                                                                                                                                                                                                                                                                                                                                                       |
| Article Type:                 | Original research                                                                                                                                                                                                                                                                                                                                                                                                                                                                                                                                                                                                                                                                                                                                                                                                                                                                                                                                                                                                                                                                                                                                                                                                                         |
| Date Submitted by the Author: | 06-Apr-2021                                                                                                                                                                                                                                                                                                                                                                                                                                                                                                                                                                                                                                                                                                                                                                                                                                                                                                                                                                                                                                                                                                                                                                                                                               |
| Complete List of Authors:     | Smith, Laurie W.; BC Cancer Agency, Cancer Control Research; BC Women's Hospital and Health Centre, Women's Health Research Institute<br>Racey, C. Sarai; The University of British Columbia, Faculty of Medicine; BC Women's Hospital and Health Centre, Women's Health Research Institute<br>Gondara, Lovedeep; BC Cancer Agency, Cancer Surveillance and Outcomes<br>Krajden, Mel; BC Centre for Disease Control, Public Health Laboratory; The University of British Columbia, Faculty of Medicine<br>Lee, Murette; The University of British Columbia, Faculty of Medicine; BC Cancer Agency, Cervix Screening Program<br>Martin, Ruth Elwood; The University of British Columbia, Faculty of Medicine<br>Peacock, Stuart; BC Cancer Agency, Cancer Control Research ; Simon Fraser University, Faculty of Health Sciences<br>Coldman, Andrew; BC Cancer Agency, Cancer Control Research<br>Franco, Eduardo; McGill University, Department of Oncology<br>van Niekerk, Dirk; BC Cancer Agency, Cervix Screening Program; The University of British Columbia, Faculty of Medicine<br>Ogilvie, Gina; The University of British Columbia, Faculty of Medicine; BC Women's Hospital and Health Centre, Women's Health Research Institute |
| Keywords:                     | Health policy < HEALTH SERVICES ADMINISTRATION & MANAGEMENT, Public health < INFECTIOUS DISEASES, PUBLIC HEALTH, PREVENTIVE MEDICINE, Gynaecological oncology < ONCOLOGY                                                                                                                                                                                                                                                                                                                                                                                                                                                                                                                                                                                                                                                                                                                                                                                                                                                                                                                                                                                                                                                                  |
|                               |                                                                                                                                                                                                                                                                                                                                                                                                                                                                                                                                                                                                                                                                                                                                                                                                                                                                                                                                                                                                                                                                                                                                                                                                                                           |

SCHOLARONE™  
Manuscripts

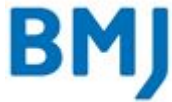

I, the Submitting Author has the right to grant and does grant on behalf of all authors of the Work (as defined in the below author licence), an exclusive licence and/or a non-exclusive licence for contributions from authors who are: i) UK Crown employees; ii) where BMJ has agreed a CC-BY licence shall apply, and/or iii) in accordance with the terms applicable for US Federal Government officers or employees acting as part of their official duties; on a worldwide, perpetual, irrevocable, royalty-free basis to BMJ Publishing Group Ltd ("BMJ") its licensees and where the relevant Journal is co-owned by BMJ to the co-owners of the Journal, to publish the Work in this journal and any other BMJ products and to exploit all rights, as set out in our [licence](#).

The Submitting Author accepts and understands that any supply made under these terms is made by BMJ to the Submitting Author unless you are acting as an employee on behalf of your employer or a postgraduate student of an affiliated institution which is paying any applicable article publishing charge ("APC") for Open Access articles. Where the Submitting Author wishes to make the Work available on an Open Access basis (and intends to pay the relevant APC), the terms of reuse of such Open Access shall be governed by a Creative Commons licence – details of these licences and which [Creative Commons](#) licence will apply to this Work are set out in our licence referred to above.

Other than as permitted in any relevant BMJ Author's Self Archiving Policies, I confirm this Work has not been accepted for publication elsewhere, is not being considered for publication elsewhere and does not duplicate material already published. I confirm all authors consent to publication of this Work and authorise the granting of this licence.

1  
2  
3 1 Women's acceptability of and experience with primary human papillomavirus testing for cervix  
4 2 screening: HPV FOCAL trial cross-sectional online survey results  
5 3  
6 4

7 5 Laurie W Smith<sup>1,2</sup>, C. Sarai Racey<sup>2,3</sup>, Lovedeep Gondara<sup>4</sup>, Mel Krajden<sup>3,5</sup>, Murette Lee<sup>3,6</sup>, Ruth  
8 6 Elwood Martin<sup>3</sup>, Gavin Stuart<sup>3</sup>, Stuart Peacock<sup>1,7</sup>, Andrew J Coldman<sup>1</sup>, Eduardo L Franco<sup>8</sup>, Dirk  
9 7 van Niekerk<sup>3,6</sup>, Gina S. Ogilvie<sup>2,3</sup>  
10 8

11 8  
12 9 Affiliations

- 13 10 1. Cancer Control Research, BC Cancer, Vancouver Canada  
14 11 2. Women's Health Research Institute, BC Women's Hospital, Vancouver Canada  
15 12 3. Faculty of Medicine, University of British Columbia, Vancouver Canada  
16 13 4. Cancer Surveillance and Outcomes, BC Cancer, Vancouver Canada  
17 14 5. Public Health Laboratory, BC Centre for Disease Control, Vancouver Canada  
18 15 6. Cervix Screening Program, BC Cancer, Vancouver Canada  
19 16 7. Faculty of Health Sciences, Simon Fraser University, Vancouver Canada  
20 17 8. Division of Cancer Epidemiology, McGill University, Montreal Quebec  
21 18  
22 19  
23 20

24 21 Corresponding Author:

25 22 Laurie W Smith

26 23 H203-4500 Oak Street

27 24 Vancouver BC, V6H 3N1

28 25 [Laurie.smith@bccancer.bc.ca](mailto:Laurie.smith@bccancer.bc.ca)  
29 26  
30 27

31 28 Prepared for submission: BMJ Open  
32 29

33 30 Word Count: (currently: 3631)  
34 31

35 32 Key Words: human papillomavirus; HPV; HPV testing for cervix screening; attitudes and  
36 33 acceptance HPV testing.  
37 34  
38 35  
39 36  
40 37  
41 38  
42 39  
43 40  
44 41  
45 42  
46 43  
47 44  
48 45  
49 46  
50 47  
51 48  
52 49  
53 50  
54 51  
55 52  
56 53  
57 54  
58 55  
59 56  
60 57

1  
2  
3 52  
4 53 **ABSTRACT:** (word count 257)  
5

6 54  
7  
8 55 **Objective:** To study participant's acceptability of and attitudes towards human papillomavirus  
9  
10 56 (HPV) testing compared to cytology for cervical cancer screening, and what impact having an  
11  
12 57 HPV positive result may have in future acceptability of screening.  
13

14  
15 58 **Design:** Cross-sectional online survey of clinical trial participants.  
16

17 59 **Setting:** Primary care, population-based Cervix Screening Program, British Columbia, Canada.  
18

19 60 **Participants:** A total of 5,532 participants from the HPV FOCAL Trial, in which women received  
20  
21 61 HPV and cytology testing at study exit were included in the analysis. Median age was 54 years.  
22  
23 62 The median time of survey completion was 3 years after trial exit.  
24

25 63 **Outcome measures:** Acceptability of HPV testing for primary cervical cancer screening  
26  
27 64 (primary); attitudes and patient perceptions towards HPV testing and receipt of HPV positive  
28  
29 65 screen results (secondary).  
30

31 66 **Results:** Most respondents (63%) were accepting of HPV testing, with the majority (69%)  
32  
33 67 accepting screening to begin at age 30 with HPV testing. Only half of participants (54%) were  
34  
35 68 accepting of an extended screening interval of 4 to 5 years. In multivariable regression, women  
36  
37 69 who reported HPV testing as acceptable were more likely to have received an HPV positive  
38  
39 70 screen test result during the trial (OR=1.41 95%CI: 1.11,1.80), and were older (OR= 1.01,  
40  
41 71 95%CI:1.00,1.02).  
42  
43

44 72 **Conclusions:** In this evaluation of acceptability and attitudes regarding HPV testing for cervix  
45  
46 73 screening, most are accepting of HPV testing for screening; however, findings indicate  
47  
48 74 heterogeneity in concerns and experiences surrounding HPV testing and receipt of HPV positive  
49  
50 75 results. These findings provide insights for the development of education, information, and  
51  
52 76 communication strategies during implementation of HPV-based cervical cancer screening.  
53  
54

55 77  
56  
57  
58  
59  
60

1  
2  
3 78 **Trial Registration:** ISRCTN79347302 and ClinicalTrials.gov Identifier: NCT00461760  
4  
5 79

6  
7 80 **ARTICLE SUMMARY**  
8  
9 81

10 81  
11 82 **'Strengths and limitation of this Study'**  
12  
13

- 14 83  
15  
16 84 • Measures of acceptability and patient perceptions of HPV testing within a primary cervix  
17 screening program.  
18 85  
19  
20 86  
21  
22 87 • Reports on acceptability of increased screening interval and delayed onset of screening  
23 initiation, and impact of a positive HPV test result.  
24 88  
25  
26 89  
27  
28 90 • Recommendations for key health promotion messaging to address potential barriers to  
29 HPV testing for primary cervical screening.  
30 91  
31  
32 92  
33  
34 93 • Limitations include that participants were recruited from a large clinical trial on HPV  
35 testing for cervical cancer screening and may not be representative of the general  
36 screening population.  
37 94  
38  
39 95  
40  
41 96  
42  
43 97  
44

45 98 **Funding:** This work was supported by the Canadian Institutes of Health Research (CIHR) MCT-  
46 82072  
47  
48 99  
49

50 100  
51  
52  
53  
54  
55  
56  
57  
58  
59  
60

## 101 INTRODUCTION

102

103 It is well established that persistent infection with an oncogenic strain of the human  
104 papillomavirus (HPV), the most common sexually transmitted infection around the world, is the  
105 causative agent for most cervical cancers [1,2]. There is a robust body of evidence regarding  
106 the superior performance of HPV vs. cytology screening in detection of cervical intraepithelial  
107 neoplasia (CIN) grade 2 or worse (CIN2+) and greater protection against cervical cancer [3–5].  
108 As such, several countries around the world have implemented primary HPV testing for cervical  
109 cancer screening, including Australia, the Netherlands, and the UK, with many other  
110 jurisdictions in various planning stages for HPV-based screening implementation. A shift to an  
111 HPV-based screening approach results in different program guidelines and, thus, a different  
112 experience for the person undergoing screening. The very high negative predictive value of  
113 HPV testing permits the interval between screens to be extended to 5 or more years compared  
114 to cytology testing, recommended every 2 to 3 years in most jurisdictions [5–7]. Due to high  
115 prevalence and regression rates of HPV infection in younger women, HPV-based screening  
116 may not be recommended until 25 to 30 years of age [5,6]. In addition, being screened for  
117 cervical cancer with a test for a sexually transmitted infection can result in anxiety and concern  
118 for those undergoing screening [8,9].

119

120 With such a transformative change in what is arguably a well-established screening paradigm, it  
121 is crucial to examine women's readiness or acceptance of HPV testing compared to cytology  
122 testing for screening, to ensure engagement in screening is not hampered by a change in  
123 technology or guidelines. This unintended consequence was illustrated in Australia, prior to the  
124 change in the national program from cytology to HPV screening, when a 2017 petition opposing  
125 the changes garnered 70,000 signatures [10]. Respondents to the Australian survey indicated  
126 concerns about such things as the extended interval and missing cancer cases in younger

1  
2  
3 127 women as a result of the program change [10]. Despite enhancements to screening efficacy and  
4  
5 128 safety, a successful change in technology requires acceptance by those who undergo  
6  
7 129 screening. Anticipating women's questions and concerns prior to implementation of program  
8  
9 130 changes can mitigate resistance to change and assist in the design of targeted education  
10  
11 131 strategies.  
12

13  
14 132  
15  
16 133 This analysis is of the 48-month exit survey for the Human Papillomavirus For Cervical Cancer  
17  
18 134 Screening Trial (HPV FOCAL). HPV FOCAL is currently the only North American trial comparing  
19  
20 135 primary HPV testing to cytology (liquid-based) for screening within an organized program, which  
21  
22 136 also provides us with the unique opportunity to assess women's experiences with HPV testing in  
23  
24 137 a population-based program setting. The primary objective of this analysis was to explore  
25  
26 138 participant's acceptability of and attitudes towards HPV testing compared to cytology for cervical  
27  
28 139 cancer screening, and what impact having an HPV positive result may play in future  
29  
30 140 acceptability of screening.  
31

32  
33 141

34  
35 142  
36  
37  
38  
39  
40  
41  
42  
43  
44  
45  
46  
47  
48  
49  
50  
51  
52  
53  
54  
55  
56  
57  
58  
59  
60



## 143 **METHODS**

### 144 **Participants**

145 Survey participants were recruited through the HPV FOCAL trial, a publicly funded randomized  
146 control trial comparing primary HPV testing every four years (HPV arm) to liquid-based cytology  
147 testing (cytology arm) every two years for cervical cancer screening (ISRCTN79347302). HPV  
148 FOCAL recruited women, 25-65 years of age, from two largely metro areas in British Columbia  
149 who were due for cervical cancer screening from 2008 through to 2012. Trial design and  
150 primary outcome results have been previously described in detail [3,11–14]. Participants were  
151 provided with information on HPV, HPV testing and cervical cancer upon enrollment and  
152 throughout the trial follow-up period. A total of 9552 women were randomized to the HPV arm  
153 and 9457 women to the cytology arm. Women from both the HPV and cytology arms completed  
154 trial exit screening between 2012 and 2016, where they received HPV and cytology co-testing at  
155 the exit screen. Results were provided to their primary care provider, who then conveyed them  
156 to the participants. From August 2017-February 2018 women from both arms who had attended  
157 the 48-month exit screen were invited to complete the online exit survey (FIGURE 1).

158

### 159 **HPV FOCAL exit survey**

160 The survey included 26 items that asked participants about HPV knowledge and information  
161 seeking before and during the study, acceptability of HPV testing, willingness to increase the  
162 screening interval, commencement screening age for HPV testing, attitudes and concerns about  
163 test positive results and communication needs around screening results, in addition to  
164 demographic details (SUPPLEMENTARY FILE). Responses included 7- and 5-point Likert  
165 scales, and survey responses were linked to HPV FOCAL trial screen test results. Survey items  
166 were based upon previous HPV FOCAL surveys assessing HPV testing acceptance [15] The  
167 survey was distributed and managed using the web-based platform of Fluidsurveys

1  
2  
3 168 ([www.fluidsurveys.com](http://www.fluidsurveys.com)). The survey was pilot tested and revised for face and content validity  
4  
5 169 with approximately 20 women, aged 30 and above prior to distribution to FOCAL participants.  
6

7 170

### 9 171 **Patient and public involvement**

11 172 Patient concerns and questions identified the need for the study. Patients were involved in pilot  
12  
13 173 testing and revision of the survey.  
14

15 174

### 18 175 **Response rate and inclusion criteria**

19  
20 176 Participants from the HPV FOCAL trial from both the HPV and cytology arms who had  
21  
22 177 completed their study 48 month exit screen, had indicated consent to be contacted for future  
23  
24 178 research, and for whom email addresses were available were eligible for survey invitation. The  
25  
26 179 invite to complete the survey was sent via email, with one reminder sent a month later for those  
27  
28 180 who had not initiated or completed the survey. Participants were provided with a unique study  
29  
30 181 identifier to access the survey and no personal identifiers were captured during survey  
31  
32 182 completion. Participants were informed they had the option to complete none, some, or all of the  
33  
34 183 survey with completion of survey questions as indication of consent.  
35

36 184

37  
38  
39 185 Survey completeness was reviewed, and duplicate surveys, where the same woman completed  
40  
41 186 all or some of the survey more than once, were identified. For those with a duplicate entry, the  
42  
43 187 first complete survey was used in the analysis with all other survey attempts discarded.

44  
45 188 Response rate (%) was the sum of completed surveys plus partial surveys, divided by the  
46  
47 189 number of invitations sent to eligible valid email addresses, as per the American Association for  
48  
49 190 Public Opinion Research guidelines[16]. Non-response included: refusals (clicked the survey  
50  
51 191 link, but did not complete consent or any items), and those assumed eligible with no response  
52  
53 192 received. Email addresses that were undeliverable were considered invalid and not included in  
54  
55 193 the analysis.  
56  
57  
58  
59  
60

### 194 **Statistical analysis**

195 Survey respondents were compared to HPV FOCAL trial participants on age, study arm, and  
196 location of trial recruitment to explore if survey sample was representative of FOCAL trial  
197 population.

198  
199 Our main outcome of HPV testing acceptability was assessed by response to the question  
200 “having an HPV test instead of a Pap to screen for cervical cancer is acceptable to me”, which  
201 was dichotomized from a 5-point Likert scale, with those reporting strongly agree or agree,  
202 categorized as ‘accepting’, and those reporting neutral, don’t know, disagree and strongly  
203 disagree as ‘not accepting’ of HPV testing. This categorization was chosen to capture those  
204 who were truly accepting and biased towards the null. Only complete surveys were included,  
205 with those who were missing or preferred not to answer excluded. Participants were classified  
206 as being HPV positive, if they received an HPV positive screening result at any point during their  
207 participation in the HPV FOCAL trial, otherwise a participant was classified as HPV negative.

208  
209 Bivariable analysis explored differences in acceptability of HPV testing based on demographics,  
210 HPV screening test result, and length of time since study exit. Factors associated with  
211 acceptability, such as HPV screening starting at 30 years of age and increased screening  
212 interval, were also examined.

213  
214 Socio-demographics and attitudes towards HPV testing were explored descriptively with Chi-  
215 square and Fisher’s exact tests (where applicable) for categorical variables and median score  
216 test for continuous variables.

217

1  
2  
3 218 Multivariate logistic regression was used to explore the association of the acceptability of HPV  
4  
5 219 testing with *a priori* identified confounding variables that reached  $p < 0.2$  in bivariable analysis.  
6  
7 220 Level of significance was 0.05. All statistical analyses were performed in SAS 9.4 and R4.02.  
8  
9  
10 221

## 11 222 **Ethics Approval**

12  
13 223 Ethics approvals for survey was received by the University of British Columbia Research Ethics  
14  
15 224 Board (H06-04032). In addition, a privacy review was undertaken to ensure the survey complied  
16  
17 225 with provincial privacy legislation.  
18  
19  
20 226

## 21 227 **RESULTS**

22  
23 228 Survey invites were administered from August 2017 through to February 2018. A total of 14,535  
24  
25 229 participants from both the HPV and cytology arms in HPV FOCAL trial were identified as eligible  
26  
27 230 to receive 48-months exit online survey, of which 13,176 were delivered to a valid email address  
28  
29 231 (FIGURE 1). There were 5,532 surveys completed, of which 4,938 were fully and 594 partially  
30  
31 232 completed.  
32  
33  
34 233

### 35 234 **Characteristics of respondents**

36  
37 235 The median age of participants completing the survey was 54 years (IQR: 46,62) (Table 1). The  
38  
39 236 median time of survey completion was 3 years after study exit. The majority of respondents  
40  
41 237 (67%) had completed college or higher education and 77% reported living with a partner.  
42  
43 238 Survey respondents were comparable to HPV FOCAL trial participants based on study arm, age  
44  
45 239 at HPV FOCAL trial enrollment, and geographical location. Survey respondents and non-  
46  
47 240 respondents were comparable by study arm and marital status, but those who responded to the  
48  
49 241 survey were slightly older than non-responders, although this was not a meaningful difference.  
50  
51  
52 242  
53  
54  
55 243

### 244 **Acceptability of HPV testing for Screening**

245  
246 Overall, 63% of survey respondents agreed or strongly agreed that HPV testing for cervical  
247 cancer screening was acceptable, with 37% not agreeing (11% disagree, 16% neutral, 10%  
248 don't know) (Table 1). There were no significant associations between acceptability of HPV  
249 testing and marital partnership status, time since study exit, education or income. Women who  
250 received an HPV positive result at any point during HPV FOCAL trial and who were older were  
251 more accepting of HPV testing compared to those who remained HPV negative during trial  
252 participation.

253  
254 In multivariate analysis, women who reported HPV testing as acceptable were more likely to  
255 have received an HPV positive screen test result at some point during the trial (OR 1.41 95%CI  
256 1.11,1.80, p=0.005), and were older (OR 1.01, 95%CI 1.00,1.02, p=0.01) (Table 2).

257  
258 Over half of respondents (54%) agreed with the statement "I would be willing to have an HPV  
259 test every 4-5 years instead of a Pap every 3 years". There was a significant difference in  
260 acceptability of an extended screening interval between those who reported being accepting of  
261 HPV testing compared to those who were not accepting. Overall, 69% responded that HPV  
262 testing starting at age 30 was acceptable, with over 80% of those who were accepting of HPV  
263 testing reporting agreement with a higher screening age (30 years or over) compared to Pap  
264 testing (Table 1).

265  
266 In addition, 66% of respondents reported that an extended screening would not result in less  
267 visits to their healthcare provider for other medical reasons, indicating that despite the extended  
268 interval recommended with HPV-based screening, women would continue to see their providers  
269 for medical reasons as needed.

1  
2  
3 **270 Attitudes towards an HPV Positive Test Result:**  
4

5 271

6  
7 272 Survey respondents were asked to rate their level of agreement with a variety of statements  
8  
9 273 regarding attitudes surrounding receipt of HPV positive results (Table 3). Women were asked if  
10  
11 274 they would be more concerned about receiving a positive HPV test or an abnormal Pap result,  
12  
13 275 for which most respondents (73%) reported that both screening outcomes would concern them  
14  
15 276 equally. However, those that reported HPV testing to be acceptable, reported that an HPV  
16  
17 277 positive result would concern them more (14%) than an abnormal Pap. This was statistically  
18  
19 278 different compared to those who were not accepting of HPV testing, who responded that  
20  
21 279 abnormal Pap test results would concern them more. The difference in distribution between  
22  
23 280 these responses was statistically significant.  
24  
25

26 281

27  
28 282 Most respondents who were not accepting of HPV testing indicated that having a sexually  
29  
30 283 acquired infection would concern them differently than having abnormal Pap results. The  
31  
32 284 relationship between level of agreement with HPV testing acceptability and ones' level of  
33  
34 285 concern about having a sexually acquired infection was significant. Regardless of a  
35  
36 286 respondent's reported HPV testing acceptability, most respondents felt it important to them to  
37  
38 287 know who gave them HPV and when they acquired HPV (72% and 78% respectively). Most  
39  
40 288 respondents indicated they disagreed or were neutral regarding feeling judged for having HPV,  
41  
42 289 and there was no significant relationship between feeling judged and level of agreement with  
43  
44 290 HPV testing. More respondents who were accepting of HPV testing indicated they would feel  
45  
46 291 comfortable telling their partner if they had HPV, which was in contrast to those who were not  
47  
48 292 accepting of HPV testing; these differences indicated a significant relationship between HPV  
49  
50 293 testing acceptance and comfort disclosing HPV status to a partner. Regardless of level of  
51  
52 294 agreement with HPV testing, most respondents (79%) indicated they would feel concerned  
53  
54 295 about transmitting HPV to their partner(s). More respondents who were accepting of HPV  
55  
56  
57  
58  
59  
60

1  
2  
3 296 testing would feel confident in the recommendations from their provider for the management of  
4  
5 297 their HPV positive results. There was a significant association between level of agreement with  
6  
7 298 HPV testing and degree of confidence with provider recommendations.  
8

9 299

### 11 300 **Sources of information for HPV testing and screening:**

13 301 Overall, the most reported important sources of information were health care providers and BC  
14  
15 302 Cancer, the agency that is responsible for the cervix screening program in British Columbia  
16  
17 303 (Table 4). In addition, those that are accepting of HPV testing were more likely to look to their  
18  
19 304 health care providers and BC Cancer as important sources of information. Regardless of one's  
20  
21 305 level of agreement with HPV testing for screening, friends and family or social media were not  
22  
23 306 as important as health care providers and BC Cancer for sources of information.  
24  
25

26 307

## 28 308 **DISCUSSION**

29 309

31  
32 310 Acceptability of, and attitudes, towards primary HPV testing were analysed from 5,532 women  
33  
34 311 who completed HPV testing as part of the HPV FOCAL trial, which was embedded within an  
35  
36 312 organized population-based cervical cancer screening program. Most respondents (63%) were  
37  
38 313 accepting of HPV testing for cervix screening and for screening with HPV testing to begin at age  
39  
40 314 30 (69%). Just over half were accepting of HPV testing with the extended screen interval of 4 to  
41  
42 315 5 years (54%). Although most women were accepting, the proportion of respondents indicating  
43  
44 316 they disagreed with or were neutral in their acceptance of HPV testing and of extended intervals  
45  
46 317 was higher than we expected considering this was a group of people who were provided with  
47  
48 318 education and information about HPV, HPV testing, and cervical cancer. These findings are  
49  
50 319 similar to other studies that indicate women have concerns about the extended interval  
51  
52 320 recommended with HPV testing [10,17–19], stemming from a belief that a cancer diagnosis may  
53  
54 321 be missed through extension of the interval. Considering study participants received information  
55  
56  
57  
58  
59  
60

1  
2  
3 322 regarding HPV, the natural history of HPV and cervical cancer, and the rationale for HPV testing  
4  
5 323 compared to the Pap test, these findings indicate that additional research and patient  
6  
7 324 engagement is needed to gain insights and identify and develop resources or procedures to  
8  
9 325 address barriers to HPV testing and an extended screening interval.  
10

11  
12 326

13  
14 327 This multivariate analysis found that those who received positive HPV test results at some point  
15  
16 328 during the trial were more likely to be accepting of HPV testing for cervix screening than those  
17  
18 329 who never received an HPV positive result. Those who tested HPV positive would have  
19  
20 330 received additional information and counseling from their healthcare provider and or a Study  
21  
22 331 nurse, which would have included information that would not necessarily have been provided to  
23  
24 332 those who tested HPV negative. This additional reinforcement of education, and an opportunity  
25  
26 333 for dialogue when receiving the positive result, may have facilitated improvement in knowledge  
27  
28 334 and subsequently, enhanced acceptance of HPV testing. Other findings have indicated that  
29  
30 335 increased HPV and HPV screening knowledge can be a facilitator of HPV screening  
31  
32 336 acceptance[20].  
33

34  
35 337

36  
37 338 One of the concerns with an extended screening interval is if women would be less likely to  
38  
39 339 consult with the health care provider for other medical reasons. When we asked participants if  
40  
41 340 they would be less willing to see a healthcare provider for other medical reasons if the interval  
42  
43 341 for cervix screening were increased, most respondents said they would not be less willing,  
44  
45 342 indicating that the extended interval for cervix screening would not prevent them from seeking  
46  
47 343 care as needed. This finding can provide reassurance to healthcare professionals who have  
48  
49 344 concerns that the extended screening interval recommended with HPV-based screening would  
50  
51 345 lead to fewer visits to a clinician, given that the cervical screen visit is often an opportunity for  
52  
53 346 the clinician to assess other preventive care or medical issues [21].  
54

55  
56 347  
57  
58  
59  
60



1  
2  
3 348 Respondents' concerns regarding receipt of HPV positive results were varied. Nearly 93% of the  
4  
5 349 respondents never received an HPV positive result during the HPV FOCAL trial. As a result, the  
6  
7 350 majority of responses evaluate attitudes and experiences for those who did not actually receive  
8  
9 351 HPV positive results, and therefore, reflect how the respondents would hypothetically feel if they  
10  
11 352 were to receive HPV positive results. Of the respondents, 7.5% had received an HPV positive  
12  
13 353 result at some point during their trial participation.  
14  
15

354

16  
17  
18 355 Most participants indicated that having HPV would cause them concern about having cervical  
19  
20 356 cancer. The majority of participants reported that having either an abnormal Pap or a positive  
21  
22 357 HPV test would concern them; however, for those that had tested positive for HPV, they  
23  
24 358 reported that an HPV test would concern them more compared to an abnormal Pap. Overall,  
25  
26 359 participants' perceptions about HPV positive results and cervical cancer indicate that increased  
27  
28 360 knowledge regarding the specificity of HPV testing for cervical cancer screening is needed.  
29  
30

361

31  
32  
33 362 Receipt of positive HPV results has been associated with higher anxiety and distress compared  
34  
35 363 to receipt of abnormal Pap results[22–24], which may be due to the fact that HPV is a sexually  
36  
37 364 transmitted infection and has been associated with levels of shame and stigma [25,26]. Most  
38  
39 365 respondents in our survey indicated that receiving results for a sexually acquired HPV infection  
40  
41 366 would concern them differently than having an abnormal Pap test result; however, this belief  
42  
43 367 varied depending on a participant's acceptability of HPV testing. Women who were not  
44  
45 368 accepting of HPV testing indicated that a HPV positive result would concern them differently  
46  
47 369 than abnormal Pap results, compared to those who were accepting of HPV testing [22–  
48  
49 370 24][25,26]. Most respondents, whether they accepted HPV testing or not, felt it important for  
50  
51 371 them to know who gave them HPV and when they got it (71% and 78% respectively). These  
52  
53 372 findings together are reflective of other research findings[9,27,28] and indicate that when  
54  
55 373 developing education and communication strategies, emphasis should be placed on the high  
56  
57  
58  
59  
60

1  
2  
3 374 prevalence of HPV in the population, the transient nature of most HPV infections, bringing  
4  
5 375 awareness to the fact an infection may have been acquired several years prior to a positive test  
6  
7 376 result. Differentiating HPV from other STIs may minimize anxiety and facilitate normalization  
8  
9 377 and acceptance[25,29].  
10

11 378  
12  
13 379 Almost 75% of the respondents indicated they felt an HPV positive result would affect their  
14  
15 380 relationship with their partner, or they weren't sure, and almost 80% would be concerned about  
16  
17 381 transmitting HPV to their partners, with many feeling they would be judged for being HPV  
18  
19 382 positive. The stigma associated with HPV, concerns about infidelity and potential partner  
20  
21 383 reactions to the HPV result may underlie these concerns. Previous research has indicated some  
22  
23 384 women question whether partner notification with HPV is necessary [29,30]. Unlike other STIs  
24  
25 385 such as chlamydia or gonorrhoea where partner notification is recommended for testing and  
26  
27 386 treatment purposes, there is usually no medical reason to notify the partner of a woman who  
28  
29 387 tested positive for HPV.  
30

31 388  
32  
33  
34 389 Healthcare providers, as trusted and valued sources of information, can influence patients'  
35  
36 390 decision-making patterns regarding health care decisions [17,31] Reflecting other findings, the  
37  
38 391 respondents in this survey indicated that the most important sources of information for them  
39  
40 392 were their healthcare providers and the provincial screening program [17,31]. As a result,  
41  
42 393 program planning for HPV-based screening should ensure health care providers are provided  
43  
44 394 with education and training surrounding HPV prior to program changes, to ensure they are  
45  
46 395 prepared to address women's questions and concerns regarding the paradigm shift from  
47  
48 396 cytology to HPV-based screening.  
49

50  
51 397  
52  
53 398 This study is not without limitations. Survey participants were part of a large clinical trial and  
54  
55 399 were given information about HPV, HPV testing and cervical cancer upon enrollment and,  
56  
57  
58  
59  
60

1  
2  
3 400 therefore, may not be representative of the general screening population of British Columbia.  
4  
5 401 The response rate may be considered low at 41%; however, those who have stronger opinions  
6  
7 402 about their screening choices may have been more likely to respond to the survey than those  
8  
9 403 who are more trusting of the health care system and accepting of any future policy changes. In  
10  
11 404 addition, survey respondents were representative of overall participants in the HPV FOCAL trial.  
12  
13 405 The majority of respondents completed the survey approximately 3 years after trial completion  
14  
15 406 and it is possible there was loss of recall of HPV related information provided to them when they  
16  
17 407 consented to participate in the trial, which for many was up to 7 years prior to survey  
18  
19 408 completion. The potential lag time between trial entry and survey completion may impact  
20  
21 409 women's attitudes and beliefs surrounding HPV testing. In addition, most of the participants in  
22  
23 410 this trial were over the age of 50, highly educated and primarily from two urban geographic  
24  
25 411 regions and may not be representative of all screen eligible people in various regions of British  
26  
27 412 Columbia.  
28  
29

30  
31 413

## 32 414 **CONCLUSIONS**

33  
34  
35 415

36  
37 416 In this study, within an organized screening setting, evaluating acceptability and attitudes  
38  
39 417 around HPV testing from women undergoing HPV-based screening, most are accepting of HPV  
40  
41 418 testing for screening; however, further research is needed to understand factors that can  
42  
43 419 increase acceptability. These findings contribute to the growing body of evidence demonstrating  
44  
45 420 that concerns and experiences surrounding HPV testing and receipt of HPV positive results are  
46  
47 421 complex and varied. As many cervix screening programs begin HPV-based screening and are  
48  
49 422 planning implementation strategies, attention to patient engagement to address potential  
50  
51 423 barriers will be important. As HPV-based screening becomes standard of care, it is plausible  
52  
53 424 that concerns with this paradigm shift will eventually be alleviated with increasing knowledge  
54  
55  
56  
57  
58  
59  
60

1  
2  
3 425 and familiarity. These findings provide insight into areas of importance that should be  
4  
5 426 considered for development of education, information, and communication strategies.  
6  
7 427  
8  
9 428  
10  
11 429  
12  
13 430  
14  
15 431  
16 432

17 **Figure 1:** Study flowchart and participant disposition  
18 433  
19 434  
20 435  
21 436  
22 437  
23 438  
24 439  
25 440  
26 441  
27 442  
28 443  
29 444  
30 445  
31 446  
32 447  
33 448  
34 449  
35 450  
36 451  
37 452  
38 453  
39 454  
40 455  
41 456  
42 457  
43 458  
44 459  
45 460  
46 461  
47 462  
48 463  
49  
50  
51  
52  
53  
54  
55  
56  
57  
58  
59  
60

464 **Table 1:** Demographic characteristics of respondents and bivariable analysis of acceptability of  
 465 HPV testing  
 466

|                                                                                                                                                                                               |                                   | Having an HPV test instead of a Pap smear to screen for cervical cancer is acceptable to me |                                                 |                       |         |
|-----------------------------------------------------------------------------------------------------------------------------------------------------------------------------------------------|-----------------------------------|---------------------------------------------------------------------------------------------|-------------------------------------------------|-----------------------|---------|
|                                                                                                                                                                                               |                                   | Total (N)                                                                                   | Not acceptable<br>(Disagree/Neutral/Don't know) | Acceptable<br>(Agree) | p-value |
| <b>Total (N)</b>                                                                                                                                                                              |                                   | <b>5336</b>                                                                                 | 1993 (37.4%)                                    | 3343 (62.6%)          |         |
| <b>Age</b>                                                                                                                                                                                    | median [IQR]                      | 5336                                                                                        | 53.35 [45.35, 61.19]                            | 54.23 [45.64, 61.72]  | 0.051   |
| <b>Marital Status<sup>a</sup></b>                                                                                                                                                             |                                   |                                                                                             |                                                 |                       |         |
|                                                                                                                                                                                               | Living with a partner             | 3806                                                                                        | 1438 ( 78.7)                                    | 2368 ( 76.6)          | 0.095   |
|                                                                                                                                                                                               | Living without a partner          | 1115                                                                                        | 390 ( 21.3)                                     | 725 ( 23.4)           |         |
| <b>Education<sup>a</sup></b>                                                                                                                                                                  |                                   |                                                                                             |                                                 |                       |         |
|                                                                                                                                                                                               | Complete College or higher        | 3317                                                                                        | 1250 ( 68.5)                                    | 2067 ( 66.7)          | 0.221   |
|                                                                                                                                                                                               | Incomplete post-secondary or less | 1607                                                                                        | 576 ( 31.5)                                     | 1031 ( 33.3)          |         |
| <b>Income<sup>a</sup></b>                                                                                                                                                                     |                                   |                                                                                             |                                                 |                       |         |
|                                                                                                                                                                                               | Less than \$75000                 | 1501                                                                                        | 529 ( 32.0)                                     | 972 ( 34.0)           | 0.175   |
|                                                                                                                                                                                               | \$75,000 or more                  | 3014                                                                                        | 1126 ( 68.0)                                    | 1888 ( 66.0)          |         |
| <b>HPV Testing Status during FOCAL trial</b>                                                                                                                                                  |                                   |                                                                                             |                                                 |                       |         |
|                                                                                                                                                                                               | Never tested HPV positive         | 4937                                                                                        | 1867 ( 93.7) 37.8%                              | 3070 ( 91.8) 62.2%    | 0.015*  |
|                                                                                                                                                                                               | At least one HPV positive result  | 399                                                                                         | 126 ( 6.3) 31.6%                                | 273 ( 8.2) 68.4%      |         |
| <b>Time since exit from FOCAL trial, Years</b>                                                                                                                                                |                                   |                                                                                             |                                                 |                       |         |
|                                                                                                                                                                                               | median [IQR]                      | 5336                                                                                        | 3.09 [2.26, 3.91]                               | 3.04 [2.23, 3.93]     | 0.616   |
| <b>I would be willing to have an HPV test every 4-5 years instead of a Pap every 3 years<sup>a</sup></b>                                                                                      |                                   |                                                                                             |                                                 |                       |         |
|                                                                                                                                                                                               | Agree                             | 2858                                                                                        | 386 ( 19.5)                                     | 2472 ( 74.2)          | <0.001* |
|                                                                                                                                                                                               | Disagree                          | 1096                                                                                        | 744 ( 37.6)                                     | 352 ( 10.6)           |         |
|                                                                                                                                                                                               | Neutral                           | 1353                                                                                        | 847 ( 42.8)                                     | 506 ( 15.2)           |         |
| <b>Receiving HPV testing starting at age 30 is acceptable to me<sup>a</sup></b>                                                                                                               |                                   |                                                                                             |                                                 |                       |         |
|                                                                                                                                                                                               | Agree                             | 3635                                                                                        | 944 ( 47.8)                                     | 2691 ( 81.0)          | <0.001* |
|                                                                                                                                                                                               | Disagree                          | 682                                                                                         | 423 ( 21.4)                                     | 259 ( 7.8)            |         |
|                                                                                                                                                                                               | Neutral                           | 981                                                                                         | 608 ( 30.8)                                     | 373 ( 11.2)           |         |
| <b>If cervical cancer screening was to occur every 4 or 5 years, instead of every 3 years, I would be less likely to visit my health care provider for other health reasons. <sup>a</sup></b> |                                   |                                                                                             |                                                 |                       |         |
|                                                                                                                                                                                               | Agree                             | 1062                                                                                        | 405 ( 20.4)                                     | 657 ( 19.7)           | 0.814   |
|                                                                                                                                                                                               | Disagree                          | 3517                                                                                        | 1303 ( 65.7)                                    | 2214 ( 66.4)          |         |
|                                                                                                                                                                                               | Neutral                           | 735                                                                                         | 274 ( 13.8)                                     | 461 ( 13.8)           |         |

Table Notes: <sup>a</sup> Missing values up to 5,336 = not reported or prefer not to answer, \* significant to p<0.05

467

468

469

470

1  
2  
3 471  
4 472  
5 473  
6 474  
7 475  
8 476  
9 477  
10 478  
11  
12  
13  
14  
15  
16  
17  
18  
19  
20  
21  
22  
23  
24  
25  
26  
27  
28  
29  
30  
31  
32  
33  
34  
35  
36  
37  
38  
39  
40  
41  
42  
43  
44  
45  
46  
47  
48  
49  
50  
51  
52  
53  
54  
55  
56  
57  
58  
59  
60

For peer review only

479 **Table 2:** Multivariate analysis of predictors for participants who are accepting of HPV testing  
480 instead of Pap testing for cervical cancer screening.  
481

| Variable                                                                    | OR (95% CI)      | P-value |
|-----------------------------------------------------------------------------|------------------|---------|
| Age at survey completion (years)                                            | 1.01 (1.00,1.02) | 0.01    |
| Received HPV positive results during study (Yes vs No)                      | 1.41 (1.11,1.80) | 0.005   |
| Education (Incomplete post-secondary or less vs Complete College or higher) | 1.06 (0.93,1.21) | 0.41    |
| Marital status (Living without a partner vs Living with a partner)          | 1.04 (0.88,1.22) | 0.67    |
| Income (\$75000 or more vs. less than \$75000)                              | 0.97 (0.84,1.12) | 0.68    |

482  
483  
484  
485

487 **Table 3:** Experiences receiving HPV positive results

|                                                                                                                                           | HPV testing instead of Pap testing for cervical cancer: |                |              | p-value |
|-------------------------------------------------------------------------------------------------------------------------------------------|---------------------------------------------------------|----------------|--------------|---------|
|                                                                                                                                           | Total (N)                                               | Not acceptable | Acceptable   |         |
|                                                                                                                                           | 5336                                                    | 1993 (36.0%)   | 3343 (60.4%) |         |
| <b>What would concern you most: Being told you had abnormal Pap results, or being told you had HPV?<sup>a</sup></b>                       |                                                         |                |              |         |
| Being told I have abnormal Pap test results                                                                                               | 668                                                     | 274 (14.0)     | 394 (11.9)   | <0.001* |
| Being told I have HPV                                                                                                                     | 683                                                     | 197 (10.0)     | 486 (14.7)   |         |
| Both would concern me equally                                                                                                             | 3855                                                    | 1464 (74.7)    | 2391 (72.2)  |         |
| Neither would concern me                                                                                                                  | 67                                                      | 26 (1.3)       | 41 (1.2)     |         |
| <b>Having an infection that is sexually acquired (HPV) doesn't concern me any differently than abnormal Pap results would<sup>a</sup></b> |                                                         |                |              |         |
| Agree                                                                                                                                     | 1412                                                    | 442 (24.8)     | 970 (31.5)   | <0.001* |
| Disagree                                                                                                                                  | 2465                                                    | 974 (54.6)     | 1491 (48.4)  |         |
| Neutral                                                                                                                                   | 987                                                     | 369 (20.7)     | 618 (20.1)   |         |
| <b>It would be important for me to know who gave me HPV<sup>a</sup></b>                                                                   |                                                         |                |              |         |
| Agree                                                                                                                                     | 3468                                                    | 1251 (70.3)    | 2217 (71.7)  | 0.094   |
| Disagree                                                                                                                                  | 545                                                     | 188 (10.6)     | 357 (11.5)   |         |
| Neutral                                                                                                                                   | 859                                                     | 340 (19.1)     | 519 (16.8)   |         |
| <b>It would be important for me to know when I got HPV<sup>a</sup></b>                                                                    |                                                         |                |              |         |
| Agree                                                                                                                                     | 3795                                                    | 1372 (76.9)    | 2423 (78.3)  | 0.131   |
| Disagree                                                                                                                                  | 432                                                     | 151 (8.5)      | 281 (9.1)    |         |
| Neutral                                                                                                                                   | 650                                                     | 260 (14.6)     | 390 (12.6)   |         |
| <b>I think people would judge me for having HPV<sup>a</sup></b>                                                                           |                                                         |                |              |         |
| Agree                                                                                                                                     | 1775                                                    | 663 (37.4)     | 1112 (36.0)  | 0.307   |
| Disagree                                                                                                                                  | 1419                                                    | 495 (27.9)     | 924 (30.0)   |         |
| Neutral                                                                                                                                   | 1666                                                    | 617 (34.8)     | 1049 (34.0)  |         |
| <b>I would feel comfortable telling my partner if I had HPV<sup>a</sup></b>                                                               |                                                         |                |              |         |
| Agree                                                                                                                                     | 3391                                                    | 1198 (67.4)    | 2193 (71.3)  | 0.016*  |
| Disagree                                                                                                                                  | 709                                                     | 284 (16.0)     | 425 (13.8)   |         |
| Neutral                                                                                                                                   | 755                                                     | 296 (16.6)     | 459 (14.9)   |         |
| <b>I would not be concerned about transmitting HPV to my partner<sup>a</sup></b>                                                          |                                                         |                |              |         |
| Agree                                                                                                                                     | 515                                                     | 174 (9.8)      | 341 (11.1)   | 0.095   |
| Disagree                                                                                                                                  | 3825                                                    | 1400 (78.7)    | 2425 (79.0)  |         |
| Neutral                                                                                                                                   | 509                                                     | 205 (11.5)     | 304 (9.9)    |         |
| <b>Being HPV positive would not affect my relationship with my partner<sup>a</sup></b>                                                    |                                                         |                |              |         |
| Agree                                                                                                                                     | 1249                                                    | 445 (25.1)     | 804 (26.3)   | 0.035*  |
| Disagree                                                                                                                                  | 2003                                                    | 708 (39.9)     | 1295 (42.3)  |         |
| Neutral                                                                                                                                   | 1584                                                    | 622 (35.0)     | 962 (31.4)   |         |
| <b>Having HPV would not cause me any concern about cervical cancer<sup>a</sup></b>                                                        |                                                         |                |              |         |
| Agree                                                                                                                                     | 181                                                     | 52 (2.9)       | 129 (4.2)    | 0.012*  |
| Disagree                                                                                                                                  | 4112                                                    | 1499 (84.1)    | 2613 (84.8)  |         |
| Neutral                                                                                                                                   | 569                                                     | 231 (13.0)     | 338 (11.0)   |         |
| <b>I would feel confident in the recommendations from my healthcare provider for follow-up of my HPV positive result<sup>a</sup></b>      |                                                         |                |              |         |
| Agree                                                                                                                                     | 3876                                                    | 1323 (74.0)    | 2553 (82.5)  | <0.001* |
| Disagree                                                                                                                                  | 226                                                     | 97 (5.4)       | 129 (4.2)    |         |



1  
2  
3  
4  
5  
6  
7  
8  
9  
10  
11  
12  
13  
14  
15  
16  
17  
18  
19  
20  
21  
22  
23  
24  
25  
26  
27  
28  
29  
30  
31  
32  
33  
34  
35  
36  
37  
38  
39  
40  
41  
42  
43  
44  
45  
46  
47  
48  
49  
50  
51  
52  
53  
54  
55  
56  
57  
58  
59  
60

|         |     |            |            |
|---------|-----|------------|------------|
| Neutral | 780 | 369 (20.6) | 411 (13.3) |
|---------|-----|------------|------------|

Table Notes : <sup>a</sup> Missing values up to 5,336 = not reported or prefer not to answer,, \* significant to p<0.05

488  
489

For peer review only

490 **Table 4:** Important sources of HPV information

|                                                                                            |               |           | Having an HPV test instead of a Pap smear to screen for cervical cancer is acceptable to me |              |         |
|--------------------------------------------------------------------------------------------|---------------|-----------|---------------------------------------------------------------------------------------------|--------------|---------|
|                                                                                            |               | Total (N) | Not acceptable                                                                              | Acceptable   | p-value |
|                                                                                            |               | 5336      | 1993 (36.0%)                                                                                | 3343 (60.4%) |         |
| <b>Health Care Provider<sup>a</sup></b>                                                    |               |           |                                                                                             |              |         |
|                                                                                            | Important     | 3405      | 1128 ( 59.3)                                                                                | 2277 ( 70.1) | <0.001* |
|                                                                                            | Neutral       | 1256      | 560 ( 29.5)                                                                                 | 696 ( 21.4)  |         |
|                                                                                            | Not Important | 487       | 213 ( 11.2)                                                                                 | 274 ( 8.4)   |         |
| <b>BC Cancer (organizes screening in BC)<sup>a</sup></b>                                   |               |           |                                                                                             |              |         |
|                                                                                            | Important     | 2713      | 907 ( 48.7)                                                                                 | 1806 ( 56.9) | <0.001* |
|                                                                                            | Neutral       | 1649      | 673 ( 36.1)                                                                                 | 976 ( 30.8)  |         |
|                                                                                            | Not Important | 673       | 283 ( 15.2)                                                                                 | 390 ( 12.3)  |         |
| <b>Govt Websites (ex: Canadian Cancer Society/Public Health Agency Canada)<sup>a</sup></b> |               |           |                                                                                             |              |         |
|                                                                                            | Important     | 2111      | 734 ( 39.9)                                                                                 | 1377 ( 44.2) | 0.011*  |
|                                                                                            | Neutral       | 1914      | 748 ( 40.6)                                                                                 | 1166 ( 37.5) |         |
|                                                                                            | Not Important | 928       | 359 ( 19.5)                                                                                 | 569 ( 18.3)  |         |
| <b>Other websites (WebMd, blogs)<sup>a</sup></b>                                           |               |           |                                                                                             |              |         |
|                                                                                            | Important     | 1597      | 567 ( 31.3)                                                                                 | 1030 ( 33.7) | 0.112   |
|                                                                                            | Neutral       | 1997      | 776 ( 42.8)                                                                                 | 1221 ( 40.0) |         |
|                                                                                            | Not Important | 1273      | 469 ( 25.9)                                                                                 | 804 ( 26.3)  |         |
| <b>Friends/family<sup>a</sup></b>                                                          |               |           |                                                                                             |              |         |
|                                                                                            | Important     | 1336      | 453 ( 25.0)                                                                                 | 883 ( 28.9)  | 0.012*  |
|                                                                                            | Neutral       | 1865      | 725 ( 40.0)                                                                                 | 1140 ( 37.3) |         |
|                                                                                            | Not Important | 1670      | 634 ( 35.0)                                                                                 | 1036 ( 33.9) |         |
| <b>Social media<sup>a</sup></b>                                                            |               |           |                                                                                             |              |         |
|                                                                                            | Important     | 580       | 197 ( 10.9)                                                                                 | 383 ( 12.6)  | 0.004*  |
|                                                                                            | Neutral       | 1562      | 633 ( 35.1)                                                                                 | 929 ( 30.7)  |         |
|                                                                                            | Not Important | 2693      | 975 ( 54.0)                                                                                 | 1718 ( 56.7) |         |

Table Notes : <sup>a</sup> Missing values up to 5,336 = not reported or prefer not to answer,, \* significant to p<0.05

491  
492  
493  
494  
495  
496  
497  
498  
499  
500  
501  
502

1  
2  
3 503  
4 504 **Acknowledgements:** We thank the thousands of women of BC who participated in the HPV  
5 505 FOCAL Trial and completed this survey, and the hundreds of BC collaborating clinicians. We  
6 506 also extend gratitude to many partners including: The BC Cancer Cervix Screening and  
7 507 Colposcopy Program; the BC Centre for Disease Control Public Health Laboratory; the  
8 508 University of British Columbia; BC Cancer Surveillance and Outcomes Unit; Women's Health  
9 509 Research Institute; and the Canadian Institutes of Health Research.  
10 510

11 511 **Contributors:** LWS involved in conception, design and implementation of the research  
12 512 presented here, drafting and review of manuscript; CSR conducted statistical analysis and  
13 513 contributed to drafting and review of manuscript; LG conducted statistical analysis; MK, ML,  
14 514 REM, GS, SP ELF and DV are co-investigators on the HPV FOCAL Study and were involved in  
15 515 FOCAL trial design and trial management; AJC and GO are co-principal investigators of the  
16 516 FOCAL Study and oversaw conduct of the trial; all authors take responsibility for the credibility  
17 517 of the data and analysis and critically reviewed the paper and approved the final version.  
18 518

19 519 **Funding:** This work was supported by the Canadian Institutes for Health Research. MCT-  
20 520 82072. CSR is supported by a Michael Smith Foundation for Health Research Fellowship.  
21 521

22 522 **Competing interests:** MK and AC were principal investigators, and GO, DV and EF were co-  
23 523 investigators on industry funded (Hologic Inc, and Roche) investigator-led adjunct studies to the  
24 524 HPV FOCAL Trial, designed to compare the performance of different HPV testing assays. No  
25 525 investigators personally benefitted financially. Funding for these adjunct studies was not applied  
26 526 to the operation of the HPV FOCAL results presented in this paper. ELF served as an  
27 527 occasional advisor for companies involved with HPV vaccines (Merck, GSK) and HPV  
28 528 diagnostics (Roche). He also holds a patent "DNA methylation markers for early  
29 529 detection of cervical cancer," registered at the Office of Innovation and Partnerships,  
30 530 McGill University, Montreal, Quebec, Canada.  
31 531

32 532 **Patient consent for publication:** Not required  
33 533

34 534 **Ethics approval:** Ethics approvals for survey was received by the University of British Columbia  
35 535 Research Ethics Board (H06-04032).  
36 536

37 537 **Provenance and Peer review:** Not commissioned; externally peer reviewed.  
38 538

39 539 **Data availability Statement:** Deidentified participant data is available upon consideration and  
40 540 reasonable request.  
41 541

42 542  
43 543  
44 544  
45 545  
46 546  
47 547  
48 548  
49 549  
50 550  
51  
52  
53  
54  
55  
56  
57  
58  
59  
60

## REFERENCES

- 1 Walboomers JMM, Jacobs M v., Manos MM, *et al.* Human papillomavirus is a necessary  
2 cause of invasive cervical cancer worldwide. *Journal of Pathology* 1999;**189**:12–9.  
3 doi:10.1002/(SICI)1096-9896(199909)189:1<12::AID-PATH431>3.0.CO;2-F
- 4 Castellsagué X. Natural history and epidemiology of HPV infection and cervical cancer.  
5 *Gynecologic Oncology* 2008;**110**. doi:10.1016/j.ygyno.2008.07.045
- 6 Ogilvie GS, van Niekerk D, Krajden M, *et al.* Effect of screening with primary cervical HPV  
7 testing vs cytology testing on high-grade cervical intraepithelial neoplasia at 48 months:  
8 The HPV FOCAL randomized clinical trial. *JAMA - Journal of the American Medical*  
9 *Association* 2018;**320**:43–52. doi:10.1001/jama.2018.7464
- 10 Melnikow J, Henderson JT, Burda BU, *et al.* Screening for cervical cancer with high-risk  
11 human papillomavirus testing updated evidence report and systematic review for the us  
12 preventive services task force. *JAMA - Journal of the American Medical Association*  
13 *2018*;320:687–705. doi:10.1001/jama.2018.10400
- 14 Ronco G, Dillner J, Elfström KM, *et al.* Efficacy of HPV-based screening for prevention of  
15 invasive cervical cancer: Follow-up of four European randomised controlled trials. *The*  
16 *Lancet* 2014;**383**:524–32. doi:10.1016/S0140-6736(13)62218-7
- 17 Arbyn M, Ronco G, Anttila A, *et al.* Evidence regarding human papillomavirus testing in  
18 secondary prevention of cervical cancer. *Vaccine*. 2012;**30**.  
19 doi:10.1016/j.vaccine.2012.06.095
- 20 Dijkstra MG, van Zummeren M, Rozendaal L, *et al.* Safety of extending screening  
21 intervals beyond five years in cervical screening programmes with testing for high risk  
22 human papillomavirus: 14 year follow-up of population based randomised cohort in the  
23 Netherlands. *BMJ (Clinical research ed)* 2016;**355**:i4924. doi:10.1136/bmj.i4924
- 24 McBride E, Marlow LAV, Forster AS, *et al.* Anxiety and distress following receipt of results  
25 from routine HPV primary testing in cervical screening: The psychological impact of  
26 primary screening (PIPS) study. *International Journal of Cancer* 2020;**146**:2113–21.  
27 doi:10.1002/ijc.32540
- 28 Bennett KF, Waller J, Ryan M, *et al.* The psychosexual impact of testing positive for high-  
29 risk cervical human papillomavirus (HPV): A systematic review. *Psycho-Oncology*.  
30 *2019*;28:1959–70. doi:10.1002/pon.5198
- 31 Obermair HM, Dodd RH, Bonner C, *et al.* It has saved thousands of lives, so why change  
32 it?' Content analysis of objections to cervical screening programme changes in Australia.  
33 *BMJ Open* 2018;**8**. doi:10.1136/bmjopen-2017-019171
- 34 Ogilvie GS, van Niekerk DJ, Krajden M, *et al.* A randomized controlled trial of Human  
35 Papillomavirus (HPV) testing for cervical cancer screening: Trial design and preliminary  
36 results (HPV FOCAL Trial). *BMC Cancer* 2010;**10**. doi:10.1186/1471-2407-10-111
- 37 Ogilvie GS, Krajden M, van Niekerk DJ, *et al.* Primary cervical cancer screening with HPV  
38 testing compared with liquid-based cytology: results of round 1 of a randomised  
39 controlled trial -- the HPV FOCAL Study. *British journal of cancer* 2012;**107**:1917–24.  
40 doi:10.1038/bjc.2012.489

- 1  
2  
3 594 13 Coldman AJ, Gondara L, Smith LW, *et al.* Disease detection and resource use in the  
4 595 safety and control arms of the HPV FOCAL cervical cancer screening trial. *British journal*  
5 596 *of cancer* 2016;**115**:1487–94. doi:10.1038/bjc.2016.368  
6  
7 597 14 Ogilvie GS, Kraiden M, van Niekerk D, *et al.* HPV for cervical cancer screening (HPV  
8 598 FOCAL): Complete Round 1 results of a randomized trial comparing HPV-based primary  
9 599 screening to liquid-based cytology for cervical cancer. *International journal of cancer*  
10 600 2017;**140**:440–8. doi:10.1002/ijc.30454  
11  
12 601 15 Ogilvie GS, Smith LW, van Niekerk DJ, *et al.* Women’s intentions to receive cervical  
13 602 cancer screening with primary human papillomavirus testing. *International Journal of*  
14 603 *Cancer* 2013;**133**:2934–43. doi:10.1002/ijc.28324  
15  
16 604 16 The American Association for Public Opinion Research. Standard Definitions: Final  
17 605 dispositions of case codes and outcome rates for surveys. 9th Edition. 2016.  
18 606 17 Dodd RH, Mac OA, McCaffery KJ. Women’s experiences of the renewed National  
19 607 Cervical Screening Program in Australia 12 months following implementation: a  
20 608 qualitative study. *BMJ open* 2020;**10**:e039041. doi:10.1136/bmjopen-2020-039041  
21 609 18 Silver MI, Rositch AF, Burke AE, *et al.* Patient concerns about human papillomavirus  
22 610 testing and 5-year intervals in routine cervical cancer screening. *Obstetrics and*  
23 611 *Gynecology* 2015;**125**:317–29. doi:10.1097/AOG.0000000000000638  
24  
25 612 19 Gerend MA, Shepherd MA, Kaltz EA, *et al.* Understanding women’s hesitancy to  
26 613 undergo less frequent cervical cancer screening. *Preventive Medicine* 2017;**95**:96–102.  
27 614 doi:10.1016/j.ypmed.2016.11.028  
28  
29 615 20 Tatar O, Thompson E, Naz A, *et al.* Factors associated with human papillomavirus (HPV)  
30 616 test acceptability in primary screening for cervical cancer: A mixed methods research  
31 617 synthesis. *Preventive Medicine*. 2018;**116**:40–50. doi:10.1016/j.ypmed.2018.08.034  
32 618 21 Saraiya M, Berkowitz Z, Yabroff KR, *et al.* Cervical cancer screening with both human  
33 619 papillomavirus and papanicolaou testing vs papanicolaou testing alone: What screening  
34 620 intervals are physicians recommending? *Archives of Internal Medicine* 2010;**170**:977–86.  
35 621 doi:10.1001/archinternmed.2010.134  
36  
37 622 22 McBride E, Tatar O, Rosberger Z, *et al.* Emotional response to testing positive for human  
38 623 papillomavirus at cervical cancer screening: a mixed method systematic review with  
39 624 meta-analysis. *Health Psychology Review* 2020;:1–35.  
40 625 doi:10.1080/17437199.2020.1762106  
41  
42 626 23 Dodd RH, Mac O, Brotherton JML, *et al.* Levels of anxiety and distress following receipt  
43 627 of positive screening tests in Australia’s HPV-based cervical screening programme: A  
44 628 cross-sectional survey. *Sexually Transmitted Infections*. 2020;**96**:166–72.  
45 629 doi:10.1136/sextrans-2019-054290  
46  
47 630 24 McCaffery K, Waller J, Forrest S, *et al.* Testing positive for human papillomavirus in  
48 631 routine cervical screening: Examination of psychosocial impact. *BJOG: An International*  
49 632 *Journal of Obstetrics and Gynaecology*. 2004;**111**:1437–43. doi:10.1111/j.1471-  
50 633 0528.2004.00279.x  
51  
52 634 25 Waller J, v Marlow LA, Wardle J, *et al.* The association between knowledge of HPV and  
53 635 feelings of stigma, shame and anxiety. *Sex Transm Infect* 2007;**83**:155–9.  
54 636 doi:10.1136/sti.2006.023333  
55  
56  
57  
58  
59  
60

- 1  
2  
3 637 26 Shepherd MA, Gerend MA. The blame game: Cervical cancer, knowledge of its link to  
4 638 human papillomavirus and stigma. *Psychology and Health* 2014;**29**:94–109.  
5 639 doi:10.1080/08870446.2013.834057  
6  
7 640 27 Kosenko KA, Hurley RJ, Harvey JA. Sources of the uncertainty experienced by women  
8 641 with HPV. *Qualitative Health Research* 2012;**22**:534–45. doi:10.1177/1049732311424404  
9 642 28 Patel H, Moss EL, Sherman SM. HPV primary cervical screening in England: Women’s  
10 643 awareness and attitudes. *Psycho-Oncology* 2018;**27**:1559–64. doi:10.1002/pon.4694  
11 644 29 Smith L, van Niekerk D, Coldman A, *et al.* Recommendations for Implementing Human  
12 645 Papillomavirus-Based Cervical Cancer Screening: Lessons Learned from the HPV FOCAL  
13 646 Trial. *Journal of obstetrics and gynaecology Canada : JOGC = Journal d’obstetrique et*  
14 647 *gynecologie du Canada : JOGC* 2016;**38**:723–6. doi:10.1016/j.jogc.2016.04.009  
15  
16 648 30 Bennett KF, Waller J, Ryan M, *et al.* Concerns about disclosing a high-risk cervical human  
17 649 papillomavirus (HPV) infection to a sexual partner: A systematic review and thematic  
18 650 synthesis. *BMJ Sexual and Reproductive Health*. 2019. doi:10.1136/bmjsex-2019-200503  
19 651 31 Rahman M, Laz TH, McGrath CJ, *et al.* Provider recommendation mediates the  
20 652 relationship between parental human papillomavirus (HPV) vaccine awareness and HPV  
21 653 vaccine initiation and completion among 13- to 17-year-old US adolescent children.  
22 654 *Clinical Pediatrics* 2015;**54**:371–5. doi:10.1177/0009922814551135  
23  
24  
25  
26  
27  
28  
29  
30  
31  
32  
33  
34  
35  
36  
37  
38  
39  
40  
41  
42  
43  
44  
45  
46  
47  
48  
49  
50  
51  
52  
53  
54  
55  
56  
57  
58  
59  
60

Figure 1: Study Flowchart and participant disposition

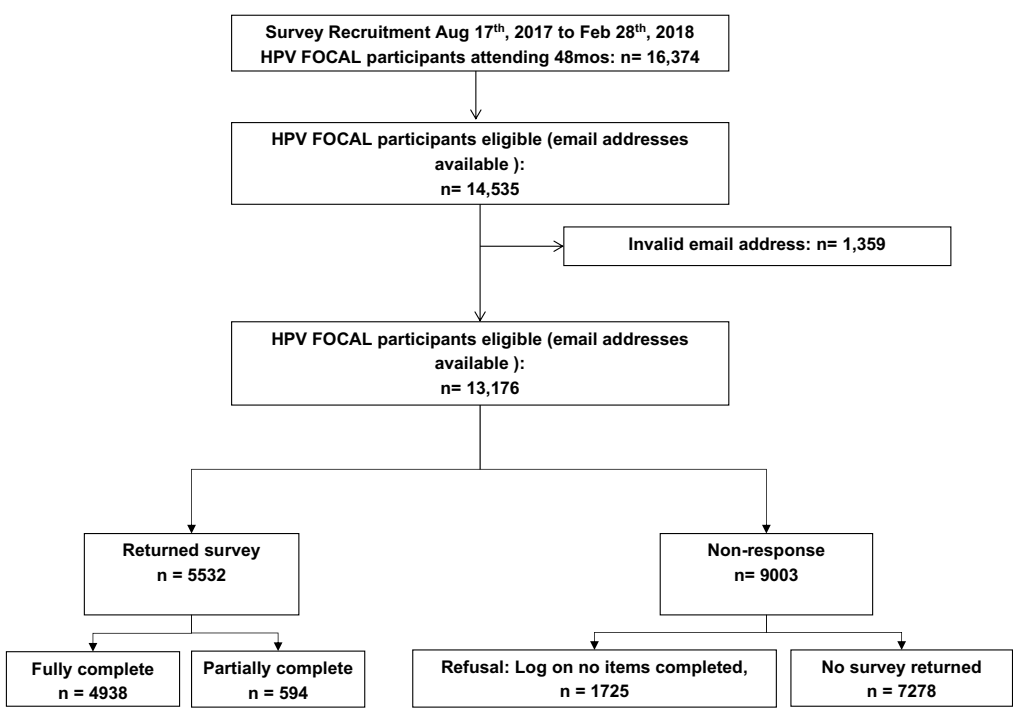

ew only

1  
2 **Thank you for contributing to the HPV FOCAL Study! As you know the purpose of the study was to**  
3 **evaluate HPV testing for cervical cancer screening in BC. The results of the FOCAL study will be very**  
4 **important as Canadian programs consider adopting HPV testing to screen for changes that may lead to**  
5 **cervical cancer. We are interested to learn about your experience and understanding of HPV testing**  
6 **for cervical cancer screening. \*\*\*As a reminder, ALL women who completed a 4 year exit screen**  
7 **received both a Pap smear and an HPV test\*\*\***  
8  
9

10 **Your input is important to us and can help plan for the future of cervical cancer screening in BC. Please**  
11 **take a few moments of your time to complete the attached survey. You do not have to answer any**  
12 **questions you do not feel comfortable answering.**  
13  
14 

---

15 First we would like to ask about your HPV knowledge before and during the study.

16  
17  
18 **1) Please rate the following question according to how much you agree or disagree with the statement:**  
19 **I know more about HPV and cervical cancer now than I did before I participated in the study:**

- 20  
21  
22  Strongly Disagree  
23  Disagree  
24  Neutral  
25  Agree  
26  Strongly agree  
27  Not Sure

28  
29  
30  
31  
32 **2) I was aware of my cervical screen (Pap and HPV test) results at completion of the study:**

- 33  
34  No  
35  Yes  
36  Not sure

37  
38  
39  
40 **3) Please rate the following question according to how much you agree or disagree with the statement:**  
41 **I had enough time to ask my health care provider questions about HPV testing and/or my results.**

- 42  
43  
44  Strongly Disagree  
45  Disagree  
46  Neutral  
47  Agree  
48  Strongly agree  
49  Don't know  
50  Not applicable

51  
52  
53  
54  
55  
56 CTRL IA Exit Survey 12June2017



- 1  
2  
3  
4  
5  
6  
7  
8  
9  
10  
11  
12  
13  
14  
15  
16  
17
- 4) Please rate the following question according to how much you agree or disagree with the statement:  
**I feel my health care provider was able to answer my questions about HPV:**

- Strongly Disagree  
 Disagree  
 Neutral  
 Agree  
 Strongly agree  
 Don't know  
 Not applicable

- 18  
19  
20  
21  
22  
23
- 5) Please rate the following statements regarding HPV testing:

**Having my health care provider collect a sample for HPV testing for cervical cancer screening would be:**

|                   | <---                     | <--                      | <-                       | Neutral                  | ->                       | -->                      | --->                     |                |
|-------------------|--------------------------|--------------------------|--------------------------|--------------------------|--------------------------|--------------------------|--------------------------|----------------|
| Accurate          | <input type="checkbox"/> | Inaccurate     |
| Safe              | <input type="checkbox"/> | Unsafe         |
| Protect my health | <input type="checkbox"/> | Harm my health |
| Acceptable        | <input type="checkbox"/> | Unacceptable   |

6) Which of the following have been important sources of information for you about HPV/HPV testing?

|                                                                                                                         | Not at all important     | Not that important       | Neutral                  | Somewhat important       | Very important           |
|-------------------------------------------------------------------------------------------------------------------------|--------------------------|--------------------------|--------------------------|--------------------------|--------------------------|
| My health care provider                                                                                                 | <input type="checkbox"/> |
| BC Cancer Agency (including the BC Cancer Agency website)                                                               | <input type="checkbox"/> |
| Government websites (ie: Canadian Cancer Society, Health Canada, Public Health Agency of Canada, BC Ministry of Health) | <input type="checkbox"/> |
| Other websites (ie: WebMD, blogs, etc)                                                                                  | <input type="checkbox"/> |
| Friends/family                                                                                                          | <input type="checkbox"/> |
| Social Media (ie: facebook, twitter, etc)                                                                               | <input type="checkbox"/> |

Other comments:.....  
 .....

1  
2 Next we would like to ask how you feel about HPV testing to screen for cervical cancer.  
3

4 *As a reminder, there are over 100 types of the human papillomavirus (HPV), of which about 40 affect the*  
5 *genital region. HPV is very common and most sexually active people will have an infection at some point*  
6 *in their lives, however it usually disappears without a person experiencing any symptoms. Only in cases*  
7 *where a cancer causing HPV type persists for many years, is there a risk that it may lead to cervical*  
8 *cancer.*  
9  
10

11 **7) Please rate the following question according to how much you agree or disagree with the statement:**  
12 **Having an HPV test to screen for cervical cancer instead of a Pap smear is acceptable to me:**  
13

- 14  
15  Strongly Disagree  
16  Disagree  
17  Neutral  
18  Agree  
19  Strongly agree  
20  Don't know  
21  
22  
23  
24

25 Comments:.....  
26

27  
28 **8) I would be willing to have an HPV test every 4 or 5 years instead of a Pap test every 3 years:**  
29

- 30  Strongly Disagree  
31  Disagree  
32  Neutral  
33  Agree  
34  Strongly agree  
35  Don't know  
36  
37  
38  
39

40 Comments: .....  
41  
42  
43  
44  
45  
46  
47  
48  
49  
50  
51  
52  
53  
54  
55

56 CTRL IA Exit Survey 12June2017  
57  
58  
59  
60

Evidence suggests that HPV testing is ideally started no earlier than 30 years of age. Should HPV testing be adopted in the province, it would be available for women starting at age 30 or 35. However, cervical cancer screening could still start at age 25 using the Pap smear as currently recommended in BC.

**9) Receiving HPV testing for cervical cancer screening, starting at age 30 is acceptable to me.**

- Strongly Disagree
- Disagree
- Neutral
- Agree
- Strongly agree
- Don't know

**10) If cervical cancer screening was to occur every 4 or 5 years, instead of every 3 years, I would be less likely to visit my health care provider for other health reasons.**

- Strongly Disagree
- Disagree
- Neutral
- Agree
- Strongly agree
- Don't know

Next we would like to understand some of your thoughts about HPV testing compared to the Pap test.

**11) What would concern you most: 1) being told you had "abnormal Pap test results" or 2) being told you were "positive for HPV"? (Check ONE only)**

- Neither would concern me
- Being told I have abnormal Pap test results
- Being told I have HPV
- Both would concern me equally

Please explain: .....

.....

CTRL IA Exit Survey 12June2017

Next, we would like to learn about your experience of receiving HPV results.

**12) If you tested HPV positive during the HPV FOCAL trial, or if you were to test positive for HPV, please rate your level of agreement with the following statements:**

|                                                                                                                                                       | <b>Strongly disagree</b> | <b>Disagree</b>          | <b>Neutral/uncertain</b> | <b>Agree</b>             | <b>Strongly Agree</b>    |
|-------------------------------------------------------------------------------------------------------------------------------------------------------|--------------------------|--------------------------|--------------------------|--------------------------|--------------------------|
| Although HPV is sexually acquired, having an infection that is sexually acquired does not concern me any differently than abnormal Pap results would. | <input type="checkbox"/> |
| It would be important for me to know who gave me HPV.                                                                                                 | <input type="checkbox"/> |
| It would be important to me to determine when I got HPV.                                                                                              | <input type="checkbox"/> |
| I think people might judge me for having HPV.                                                                                                         | <input type="checkbox"/> |
| I would feel comfortable telling my partner about my HPV positive result.                                                                             | <input type="checkbox"/> |
| I would not be concerned about transmitting HPV to a sexual partner.                                                                                  | <input type="checkbox"/> |
| Receiving a positive HPV result would not affect my relationship with my sexual partner.                                                              | <input type="checkbox"/> |
| Having HPV would not cause me any concern about developing cervical cancer.                                                                           | <input type="checkbox"/> |
| I would feel confident in the follow up and/or treatment my provider would recommend for my positive HPV result.                                      | <input type="checkbox"/> |

CTRL IA Exit Survey 12June2017

Other comments:.....  
 .....

**13) Please rate the following statements according to how much you agree or disagree:  
 If I tested positive for HPV I felt/would feel:**

|           | <b>Strongly disagree</b> | <b>Disagree</b>          | <b>Neutral/uncertain</b> | <b>Agree</b>             | <b>Strongly agree</b>    |
|-----------|--------------------------|--------------------------|--------------------------|--------------------------|--------------------------|
| Reassured | <input type="checkbox"/> |
| Relieved  | <input type="checkbox"/> |
| Guilty    | <input type="checkbox"/> |
| Worried   | <input type="checkbox"/> |
| Upset     | <input type="checkbox"/> |
| Surprised | <input type="checkbox"/> |

Other comments: .....

**14) If you were aware of your results at the end of the trial and they were negative/normal, how confident were you with the safety of these results?**

- Very unconfident
- Somewhat unconfident
- Neutral
- Somewhat confident
- Very confident
- Didn't know my results
- Not applicable/results were positive

Next we would like to ask about your thoughts about the possibility of women collecting their own sample for HPV testing for cervical cancer screening by inserting a soft Q-tip or brush into the vagina that can then be returned to the laboratory and tested for the presence of HPV. With self-collection, a woman would not need to see a health care provider for pelvic exam for sample collection. Self-collected specimens tested for HPV have been shown to be equivalent to HPV samples taken by a health care provider for detecting abnormalities of the cervix.

**15) Please rate the following statements regarding self-collected samples:**

**Collecting my own sample for cervical cancer screening would be:**

|                   | <---                     | <--                      | <-                       | Neutral                  | ->                       | -->                      | --->                     |                |
|-------------------|--------------------------|--------------------------|--------------------------|--------------------------|--------------------------|--------------------------|--------------------------|----------------|
| Accurate          | <input type="checkbox"/> | Inaccurate     |
| Safe              | <input type="checkbox"/> | Unsafe         |
| Protect my health | <input type="checkbox"/> | Harm my health |
| Acceptable        | <input type="checkbox"/> | Unacceptable   |

**16) I would be willing to collect my own sample/specimen for cervical cancer screening:**

- Strongly Disagree
- Disagree
- Neutral
- Agree
- Strongly agree
- Don't know

Comments: .....

.....

CTRL IA Exit Survey 12June2017

1  
2  
3 Finally we'd like to ask some questions that may help us better understand associations between HPV  
4 and various other factors.  
5  
6

7 **17) What is the highest level of education you have achieved?**  
8

- 9  
10  No formal education  
11  Some elementary school  
12  Completed elementary school  
13  Some high school  
14  Completed high school  
15  Some post-secondary training (Trades, college, university)  
16  Completed trade/vocational/apprenticeship program  
17  Completed college  
18  Completed university (bachelor degree)  
19  Completed university (master degree or higher)  
20  
21  
22  
23  
24  
25  
26

27 **18) Please indicate your current marital status:**  
28

- 29  Single (living WITHOUT a partner)  
30  
31  Single (living WITH a partner)  
32  
33  Married or common law  
34  
35  Divorced  
36  
37  Separated (but still legally married)  
38  
39  Widowed  
40  
41  
42

43 **19) Not including new partners you have had since you completed the HPV FOCAL study, please**  
44 **indicate to the best of your recollection, how many male partners you have had vaginal**  
45 **intercourse with:**  
46

- 47  0  
48  1-10  
49  11-49  
50  50+  
51  
52  
53  
54  
55

56 CTRL IA Exit Survey 12June2017  
57  
58  
59  
60



20) Please enter the total years you have used the following hormonal birth control methods. If never used, please enter "0". **(survey build, enter in months)**

| Method                                             | Total years used | Please place a checkmark in this column if you used this method while participating in the HPV FOCAL study |
|----------------------------------------------------|------------------|------------------------------------------------------------------------------------------------------------|
| Oral contraceptive pill                            | --               | <input type="checkbox"/>                                                                                   |
| Contraceptive patch                                | --               | <input type="checkbox"/>                                                                                   |
| Contraceptive vaginal ring                         | --               | <input type="checkbox"/>                                                                                   |
| Hormonal IUD                                       | --               | <input type="checkbox"/>                                                                                   |
| Injection (ie: Depo-provera)                       | --               | <input type="checkbox"/>                                                                                   |
| Morning after pill or emergency contraceptive pill | --               | <input type="checkbox"/>                                                                                   |
| Implant                                            | --               | <input type="checkbox"/>                                                                                   |

We are trying to better understand how use of specific substances (ie: alcohol, tobacco and marijuana) impacts a woman's potential to develop a long term HPV infection. These following questions help us determine if there is an association between HPV infection and different substances.

21) Have you ever smoked cigarettes?

- Yes (daily). For approximately how many years: \_\_
- Yes (less than daily)
- Not at all

22) Were you a regular cigarette smoker during your participation in the HPV FOCAL Study?

- Every day....Approximately how many cigarettes did you smoke per day? \_\_
- Some days...Approximately how many days did you smoke each week? \_\_
- Not at all

**(Survey build). Only link to Q22 if answered "every day" or "some days" to Q21**

CTRL IA Exit Survey 12June2017

1  
2  
3  
4  
5  
6  
7 **23) During your participation in the HPV FOCAL Study, how often did you use marijuana:**

- 8  
9  Never  
10  Less than once a month  
11  1-3 times a month  
12  Once a week  
13  More than once a week  
14  Every day

15  
16  
17  
18  
19 **Survey build: skip Q24 if answered "never" to Q23**

20 **24) Please indicate the ways you used marijuana during the HPV FOCAL study:**

- 21  
22  
23  Smoking  
24  Vaporizing  
25  Edible (ie: cakes, cookies, candy, drinks, etc)  
26  Pill/capsule  
27  Other

28  
29  
30  
31 **25) During your participation in the HPV FOCAL Study, how often did you drink alcoholic beverages?**

- 32  
33  
34  Never  
35  Once a month or less  
36  2-3 times a month  
37  Once a week  
38  2-3 times a week  
39  4-6 times a week  
40  Every day

41  
42  
43  
44  
45  
46  
47  
48  
49  
50  
51  
52  
53  
54  
55  
56 CTRL IA Exit Survey 12June2017

1  
2 **26) Please estimate your total household income (everyone in your household, excluding**  
3 **roommates):**  
4

- 5  Less than \$10,000
- 6  \$10,001-25,000
- 7  \$25,001-50,000
- 8  \$50,001-75,000
- 9  \$75,001-100,000
- 10  More than \$100,000
- 11
- 12
- 13
- 14
- 15

16 Thank you for completing this survey! Your responses are highly valued and impact guidelines and  
17 recommendations as the province of British Columbia considers changes to cervical cancer screening  
18 practices. If you have any questions or comments please feel free to contact the HPV FOCAL study at  
19 [hpvfocal@bccancer.bc.ca](mailto:hpvfocal@bccancer.bc.ca)  
20

21  
22  
23 .....  
24 .....

25  
26 **SURVEY BUILD: Link to a separate section where respondents can enter their name and contact info to**  
27 **be entered into a draw. We will offer an incentive for survey completion.**  
28

29  
30  
31  
32  
33  
34  
35  
36  
37  
38  
39  
40  
41  
42  
43  
44  
45  
46  
47  
48  
49  
50  
51  
52  
53  
54  
55  
56 CTRL IA Exit Survey 12June2017  
57

STROBE Statement—Checklist of items that should be included in reports of *cross-sectional studies*

|                              | Item No | Recommendation                                                                                                                                                                                               | Page No |
|------------------------------|---------|--------------------------------------------------------------------------------------------------------------------------------------------------------------------------------------------------------------|---------|
| <b>Title and abstract</b>    | 1       | (a) Indicate the study's design with a commonly used term in the title or the abstract                                                                                                                       | 1       |
|                              |         | (b) Provide in the abstract an informative and balanced summary of what was done and what was found                                                                                                          | 2       |
| <b>Introduction</b>          |         |                                                                                                                                                                                                              |         |
| Background/rationale         | 2       | Explain the scientific background and rationale for the investigation being reported                                                                                                                         | 4       |
| Objectives                   | 3       | State specific objectives, including any prespecified hypotheses                                                                                                                                             | 4       |
| <b>Methods</b>               |         |                                                                                                                                                                                                              |         |
| Study design                 | 4       | Present key elements of study design early in the paper                                                                                                                                                      | 6       |
| Setting                      | 5       | Describe the setting, locations, and relevant dates, including periods of recruitment, exposure, follow-up, and data collection                                                                              | 6       |
| Participants                 | 6       | (a) Give the eligibility criteria, and the sources and methods of selection of participants                                                                                                                  | 6       |
| Variables                    | 7       | Clearly define all outcomes, exposures, predictors, potential confounders, and effect modifiers. Give diagnostic criteria, if applicable                                                                     | NA      |
| Data sources/<br>measurement | 8*      | For each variable of interest, give sources of data and details of methods of assessment (measurement). Describe comparability of assessment methods if there is more than one group                         | 6,7     |
| Bias                         | 9       | Describe any efforts to address potential sources of bias                                                                                                                                                    | 6-8     |
| Study size                   | 10      | Explain how the study size was arrived at                                                                                                                                                                    | 7-8     |
| Quantitative variables       | 11      | Explain how quantitative variables were handled in the analyses. If applicable, describe which groupings were chosen and why                                                                                 | 6-8     |
| Statistical methods          | 12      | (a) Describe all statistical methods, including those used to control for confounding                                                                                                                        | 8       |
|                              |         | (b) Describe any methods used to examine subgroups and interactions                                                                                                                                          | 8       |
|                              |         | (c) Explain how missing data were addressed                                                                                                                                                                  | 8       |
|                              |         | (d) If applicable, describe analytical methods taking account of sampling strategy                                                                                                                           | 8       |
|                              |         | (e) Describe any sensitivity analyses                                                                                                                                                                        | 8       |
| <b>Results</b>               |         |                                                                                                                                                                                                              |         |
| Participants                 | 13*     | (a) Report numbers of individuals at each stage of study—eg numbers potentially eligible, examined for eligibility, confirmed eligible, included in the study, completing follow-up, and analysed            | 9       |
|                              |         | (b) Give reasons for non-participation at each stage                                                                                                                                                         | 9       |
|                              |         | (c) Consider use of a flow diagram                                                                                                                                                                           | 17      |
| Descriptive data             | 14*     | (a) Give characteristics of study participants (eg demographic, clinical, social) and information on exposures and potential confounders                                                                     | 9       |
|                              |         | (b) Indicate number of participants with missing data for each variable of interest                                                                                                                          | 9, 18   |
| Outcome data                 | 15*     | Report numbers of outcome events or summary measures                                                                                                                                                         | 18      |
| Main results                 | 16      | (a) Give unadjusted estimates and, if applicable, confounder-adjusted estimates and their precision (eg, 95% confidence interval). Make clear which confounders were adjusted for and why they were included | 18      |

|                          |    |                                                                                                                                                                            |       |
|--------------------------|----|----------------------------------------------------------------------------------------------------------------------------------------------------------------------------|-------|
|                          |    | (b) Report category boundaries when continuous variables were categorized                                                                                                  | n/A   |
|                          |    | (c) If relevant, consider translating estimates of relative risk into absolute risk for a meaningful time period                                                           | n/a   |
| Other analyses           | 17 | Report other analyses done—eg analyses of subgroups and interactions, and sensitivity analyses                                                                             | 9-11  |
| <b>Discussion</b>        |    |                                                                                                                                                                            |       |
| Key results              | 18 | Summarise key results with reference to study objectives                                                                                                                   | 12-15 |
| Limitations              | 19 | Discuss limitations of the study, taking into account sources of potential bias or imprecision. Discuss both direction and magnitude of any potential bias                 | 15-16 |
| Interpretation           | 20 | Give a cautious overall interpretation of results considering objectives, limitations, multiplicity of analyses, results from similar studies, and other relevant evidence | 16    |
| Generalisability         | 21 | Discuss the generalisability (external validity) of the study results                                                                                                      | 16    |
| <b>Other information</b> |    |                                                                                                                                                                            |       |
| Funding                  | 22 | Give the source of funding and the role of the funders for the present study and, if applicable, for the original study on which the present article is based              | 24    |

\*Give information separately for exposed and unexposed groups.

**Note:** An Explanation and Elaboration article discusses each checklist item and gives methodological background and published examples of transparent reporting. The STROBE checklist is best used in conjunction with this article (freely available on the Web sites of PLoS Medicine at <http://www.plosmedicine.org/>, Annals of Internal Medicine at <http://www.annals.org/>, and Epidemiology at <http://www.epidem.com/>). Information on the STROBE Initiative is available at [www.strobe-statement.org](http://www.strobe-statement.org).

# BMJ Open

## Women's acceptability of and experience with primary human papillomavirus testing for cervix screening: HPV FOCAL trial cross-sectional online survey results

|                                 |                                                                                                                                                                                                                                                                                                                                                                                                                                                                                                                                                                                                                                                                                                                                                                                                                                                                                                                                                                                                                                                                                                                                                                                                                                                                                                                                 |
|---------------------------------|---------------------------------------------------------------------------------------------------------------------------------------------------------------------------------------------------------------------------------------------------------------------------------------------------------------------------------------------------------------------------------------------------------------------------------------------------------------------------------------------------------------------------------------------------------------------------------------------------------------------------------------------------------------------------------------------------------------------------------------------------------------------------------------------------------------------------------------------------------------------------------------------------------------------------------------------------------------------------------------------------------------------------------------------------------------------------------------------------------------------------------------------------------------------------------------------------------------------------------------------------------------------------------------------------------------------------------|
| Journal:                        | <i>BMJ Open</i>                                                                                                                                                                                                                                                                                                                                                                                                                                                                                                                                                                                                                                                                                                                                                                                                                                                                                                                                                                                                                                                                                                                                                                                                                                                                                                                 |
| Manuscript ID                   | bmjopen-2021-052084.R1                                                                                                                                                                                                                                                                                                                                                                                                                                                                                                                                                                                                                                                                                                                                                                                                                                                                                                                                                                                                                                                                                                                                                                                                                                                                                                          |
| Article Type:                   | Original research                                                                                                                                                                                                                                                                                                                                                                                                                                                                                                                                                                                                                                                                                                                                                                                                                                                                                                                                                                                                                                                                                                                                                                                                                                                                                                               |
| Date Submitted by the Author:   | 02-Sep-2021                                                                                                                                                                                                                                                                                                                                                                                                                                                                                                                                                                                                                                                                                                                                                                                                                                                                                                                                                                                                                                                                                                                                                                                                                                                                                                                     |
| Complete List of Authors:       | Smith, Laurie W.; BC Cancer Agency, Cancer Control Research; BC Women's Hospital and Health Centre, Women's Health Research Institute<br>Racey, C. Sarai; The University of British Columbia, Faculty of Medicine; BC Women's Hospital and Health Centre, Women's Health Research Institute<br>Gondara, Lovedeep; BC Cancer Agency, Cancer Surveillance and Outcomes<br>Krajden, Mel; BC Centre for Disease Control, Public Health Laboratory; The University of British Columbia, Faculty of Medicine<br>Lee, Murette; The University of British Columbia, Faculty of Medicine; BC Cancer Agency, Cervix Screening Program<br>Martin, Ruth Elwood; The University of British Columbia, Faculty of Medicine<br>Stuart, Gavin ; University of British Columbia, Faculty of Medicine, Vancouver BC.<br>Peacock, Stuart; BC Cancer Agency, Cancer Control Research ; Simon Fraser University, Faculty of Health Sciences<br>Coldman, Andrew; BC Cancer Agency, Cancer Control Research<br>Franco, Eduardo; McGill University, Department of Oncology<br>van Niekerk, Dirk; BC Cancer Agency, Cervix Screening Program; The University of British Columbia, Faculty of Medicine<br>Ogilvie, Gina; The University of British Columbia, Faculty of Medicine; BC Women's Hospital and Health Centre, Women's Health Research Institute |
| <b>Primary Subject Heading</b>: | Public health                                                                                                                                                                                                                                                                                                                                                                                                                                                                                                                                                                                                                                                                                                                                                                                                                                                                                                                                                                                                                                                                                                                                                                                                                                                                                                                   |
| Secondary Subject Heading:      | Public health, Communication, Reproductive medicine                                                                                                                                                                                                                                                                                                                                                                                                                                                                                                                                                                                                                                                                                                                                                                                                                                                                                                                                                                                                                                                                                                                                                                                                                                                                             |
| Keywords:                       | Health policy < HEALTH SERVICES ADMINISTRATION & MANAGEMENT, Public health < INFECTIOUS DISEASES, PUBLIC HEALTH, PREVENTIVE MEDICINE, Gynaecological oncology < ONCOLOGY                                                                                                                                                                                                                                                                                                                                                                                                                                                                                                                                                                                                                                                                                                                                                                                                                                                                                                                                                                                                                                                                                                                                                        |
|                                 |                                                                                                                                                                                                                                                                                                                                                                                                                                                                                                                                                                                                                                                                                                                                                                                                                                                                                                                                                                                                                                                                                                                                                                                                                                                                                                                                 |

SCHOLARONE™  
Manuscripts

1  
2  
3  
4  
5  
6  
7  
8  
9  
10  
11  
12  
13  
14  
15  
16  
17  
18  
19  
20  
21  
22  
23  
24  
25  
26  
27  
28  
29  
30  
31  
32  
33  
34  
35  
36  
37  
38  
39  
40  
41  
42  
43  
44  
45  
46  
47  
48  
49  
50  
51  
52  
53  
54  
55  
56  
57  
58  
59  
60



I, the Submitting Author has the right to grant and does grant on behalf of all authors of the Work (as defined in the below author licence), an exclusive licence and/or a non-exclusive licence for contributions from authors who are: i) UK Crown employees; ii) where BMJ has agreed a CC-BY licence shall apply, and/or iii) in accordance with the terms applicable for US Federal Government officers or employees acting as part of their official duties; on a worldwide, perpetual, irrevocable, royalty-free basis to BMJ Publishing Group Ltd ("BMJ") its licensees and where the relevant Journal is co-owned by BMJ to the co-owners of the Journal, to publish the Work in this journal and any other BMJ products and to exploit all rights, as set out in our [licence](#).

The Submitting Author accepts and understands that any supply made under these terms is made by BMJ to the Submitting Author unless you are acting as an employee on behalf of your employer or a postgraduate student of an affiliated institution which is paying any applicable article publishing charge ("APC") for Open Access articles. Where the Submitting Author wishes to make the Work available on an Open Access basis (and intends to pay the relevant APC), the terms of reuse of such Open Access shall be governed by a Creative Commons licence – details of these licences and which [Creative Commons](#) licence will apply to this Work are set out in our licence referred to above.

Other than as permitted in any relevant BMJ Author's Self Archiving Policies, I confirm this Work has not been accepted for publication elsewhere, is not being considered for publication elsewhere and does not duplicate material already published. I confirm all authors consent to publication of this Work and authorise the granting of this licence.



1  
2  
3 1 Women's acceptability of and experience with primary human papillomavirus testing for cervix  
4 2 screening: HPV FOCAL trial cross-sectional online survey results  
5 3  
6 4

7 5 Laurie W Smith<sup>1,2</sup>, C. Sarai Racey<sup>2,3</sup>, Lovedeep Gondara<sup>4</sup>, Mel Krajden<sup>3,5</sup>, Murette Lee<sup>3,6</sup>, Ruth  
8 6 Elwood Martin<sup>3</sup>, Gavin Stuart<sup>3</sup>, Stuart Peacock<sup>1,7</sup>, Andrew J Coldman<sup>1</sup>, Eduardo L Franco<sup>8</sup>, Dirk  
9 7 van Niekerk<sup>3,6</sup>, Gina S. Ogilvie<sup>2,3</sup>  
10 8

11 8  
12 9 Affiliations

- 13 10 1. Cancer Control Research, BC Cancer, Vancouver Canada  
14 11 2. Women's Health Research Institute, BC Women's Hospital, Vancouver Canada  
15 12 3. Faculty of Medicine, University of British Columbia, Vancouver Canada  
16 13 4. Cancer Surveillance and Outcomes, BC Cancer, Vancouver Canada  
17 14 5. Public Health Laboratory, BC Centre for Disease Control, Vancouver Canada  
18 15 6. Cervix Screening Program, BC Cancer, Vancouver Canada  
19 16 7. Faculty of Health Sciences, Simon Fraser University, Vancouver Canada  
20 17 8. Division of Cancer Epidemiology, McGill University, Montreal Quebec  
21 18  
22 19  
23 20

24 21 Corresponding Author:

25 22 Laurie W Smith

26 23 H203-4500 Oak Street

27 24 Vancouver BC, V6H 3N1

28 25 [Laurie.smith@bccancer.bc.ca](mailto:Laurie.smith@bccancer.bc.ca)  
29 26  
30 27

31 28 Prepared for submission: BMJ Open  
32 29

33 30 Word Count: (currently:3977)  
34 31

35 32 Key Words: human papillomavirus; HPV; HPV testing for cervix screening; attitudes and  
36 33 acceptance HPV testing.  
37 34  
38 35  
39 36  
40 37  
41 38  
42 39  
43 40  
44 41  
45 42  
46 43  
47 44  
48 45  
49 46  
50 47  
51 48  
52 49  
53 50  
54 51  
55 51  
56 51  
57  
58  
59  
60

1  
2  
3 52  
4 53 **ABSTRACT:** (word count 257)  
5

6 54  
7

8 55 **Objective:** To study participant's acceptability of and attitudes towards human papillomavirus  
9  
10 56 (HPV) testing compared to cytology for cervical cancer screening, and what impact having an  
11  
12 57 HPV positive result may have in future acceptability of screening.  
13

14  
15 58 **Design:** Cross-sectional online survey of clinical trial participants.  
16

17 59 **Setting:** Primary care, population-based Cervix Screening Program, British Columbia, Canada.  
18

19 60 **Participants:** A total of 5,532 participants from the HPV FOCAL Trial, in which women received  
20  
21 61 HPV and cytology testing at study exit were included in the analysis. Median age was 54 years.  
22  
23 62 The median time of survey completion was 3 years after trial exit.  
24

25 63 **Outcome measures:** Acceptability of HPV testing for primary cervical cancer screening  
26  
27 64 (primary); attitudes and patient perceptions towards HPV testing and receipt of HPV positive  
28  
29 65 screen results (secondary).  
30

31 66 **Results:** Most respondents (63%) were accepting of HPV testing, with the majority (69%)  
32  
33 67 accepting screening to begin at age 30 with HPV testing. Only half of participants (54%) were  
34  
35 68 accepting of an extended screening interval of 4 to 5 years. In multivariable logistic regression,  
36  
37 69 women who received an HPV positive screen test result during the trial (OR=1.41 95%CI:  
38  
39 70 1.11,1.80), or were older (OR= 1.01, 95%CI:1.00,1.02) were more likely to report HPV testing  
40  
41 71 as acceptable.  
42  
43

44 72 **Conclusions:** In this evaluation of acceptability and attitudes regarding HPV testing for cervix  
45  
46 73 screening, most are accepting of HPV testing for screening; however, findings indicate  
47  
48 74 heterogeneity in concerns and experiences surrounding HPV testing and receipt of HPV positive  
49  
50 75 results. These findings provide insights for the development of education, information, and  
51  
52 76 communication strategies during implementation of HPV-based cervical cancer screening.  
53  
54

55 77  
56  
57  
58  
59  
60

1  
2  
3 78 **Trial Registration:** ISRCTN79347302 and ClinicalTrials.gov Identifier: NCT00461760  
4  
5 79

6  
7 80 **ARTICLE SUMMARY**  
8  
9 81

10 81  
11 82 **'Strengths and limitation of this Study'**  
12  
13  
14 83

- 15  
16 84 • Measures of acceptability and patient perceptions of HPV testing within a primary cervix  
17 screening program.  
18 85  
19  
20 86  
21  
22 87 • Reports on acceptability of increased screening interval and delayed onset of screening  
23 initiation, and impact of a positive HPV test result.  
24 88  
25  
26 89  
27  
28 90 • Recommendations for key health promotion messaging to address potential barriers to  
29 HPV testing for primary cervical screening.  
30 91  
31  
32 92  
33  
34 93 • Limitations include that participants were recruited from a large clinical trial on HPV  
35 testing for cervical cancer screening and may not be representative of the general  
36 screening population.  
37 94  
38  
39 95  
40  
41 96  
42  
43 97  
44

45 98 **Funding:** This work was supported by the Canadian Institutes of Health Research (CIHR) MCT-  
46 82072  
47  
48 99  
49

50 100  
51  
52  
53  
54  
55  
56  
57  
58  
59  
60

## 101 INTRODUCTION

102  
103 It is well established that persistent infection with an oncogenic strain of the human  
104 papillomavirus (HPV), the most common sexually transmitted infection around the world, is the  
105 causative agent for most cervical cancers [1,2]. There is a robust body of evidence regarding  
106 the superior performance of HPV vs. cytology screening in detection of cervical intraepithelial  
107 neoplasia (CIN) grade 2 or worse (CIN2+) and greater protection against cervical cancer [3–5].  
108 As such, several countries around the world have implemented primary HPV testing for cervical  
109 cancer screening, including Australia, the Netherlands, and the UK, with many other  
110 jurisdictions in various planning stages for HPV-based screening implementation. A shift to an  
111 HPV-based screening approach results in different program guidelines and, thus, a different  
112 experience for the person undergoing screening. The very high negative predictive value of  
113 HPV testing permits the interval between screens to be extended to 5 or more years compared  
114 to cytology testing, recommended every 2 to 3 years in most jurisdictions [5–7]. Due to high  
115 prevalence and regression rates of HPV infection in younger women, HPV-based screening  
116 may not be recommended until 25 to 30 years of age [5,6]. In addition, being screened for  
117 cervical cancer with a test for a sexually transmitted infection can result in anxiety and concern  
118 for those undergoing screening [8,9].

119  
120 With such a transformative change in what is arguably a well-established screening paradigm, it  
121 is crucial to examine women's readiness or acceptance of HPV testing compared to cytology  
122 testing for screening, to ensure engagement in screening is not hampered by a change in  
123 technology or guidelines. This unintended consequence was illustrated in Australia, prior to the  
124 change in the national program from cytology to HPV screening, when a 2017 petition opposing  
125 the changes garnered 70,000 signatures[10]. Respondents to the Australian survey indicated  
126 concerns about such things as the extended interval and missing cancer cases in younger

1  
2  
3 127 women as a result of the program change [10]. Despite enhancements to screening efficacy and  
4  
5 128 safety, a successful change in technology requires acceptance by those who undergo  
6  
7 129 screening. Anticipating women's questions and concerns prior to implementation of program  
8  
9 130 changes can mitigate resistance to change and assist in the design of targeted education  
10  
11 131 strategies.  
12

13  
14 132  
15  
16 133 This analysis is of the 48-month exit survey for the Human Papillomavirus For Cervical Cancer  
17  
18 134 Screening Trial (HPV FOCAL). HPV FOCAL is currently the only North American trial comparing  
19  
20 135 primary HPV testing to cytology (liquid-based) for screening within an organized program, which  
21  
22 136 also provides us with the unique opportunity to assess women's experiences with HPV testing in  
23  
24 137 a population-based program setting. The primary objective of this analysis was to explore  
25  
26 138 participant's acceptability of and attitudes towards HPV testing compared to cytology for cervical  
27  
28 139 cancer screening, and what impact having an HPV positive result may play in future  
29  
30 140 acceptability of screening.  
31

32  
33 141  
34  
35  
36  
37  
38  
39  
40  
41  
42  
43  
44  
45  
46  
47  
48  
49  
50  
51  
52  
53  
54  
55  
56  
57  
58  
59  
60

## 142 **METHODS**

### 143 **Participants**

144 Survey participants were recruited through the HPV FOCAL trial, a publicly funded randomized  
145 control trial comparing primary HPV testing every four years (HPV arm) to liquid-based cytology  
146 testing (cytology arm) every two years for cervical cancer screening (ISRCTN79347302). HPV  
147 FOCAL recruited women, 25-65 years of age, from two largely metro areas in British Columbia  
148 who were due for cervical cancer screening from 2008 through to 2012. Participants of the HPV  
149 FOCAL Trial were engaged in cervical cancer screening through a large population-based  
150 screening program, and representative of women at average risk of cervical cancer in North  
151 America [11] Trial design and primary outcome results have been previously described in detail  
152 [3,11–14]. Participants were provided with information on HPV, HPV testing (including  
153 differences between Pap and HPV testing, and the reasons behind an extended interval  
154 between negative HPV screens) and cervical cancer upon enrollment and throughout the trial  
155 follow-up period. A total of 9552 women were randomized to the HPV arm and 9457 women to  
156 the cytology arm. Women from both the HPV and cytology arms completed trial exit screening  
157 between 2012 and 2016, where they received HPV and cytology co-testing at the exit screen.  
158 Results were provided to their primary care provider, who then conveyed them to the  
159 participants. From August 2017-February 2018 women from both arms who had attended the  
160 48-month exit screen were invited to complete the online exit survey (FIGURE 1).

161

### 162 **HPV FOCAL exit survey**

163 The survey included 26 items that asked participants about HPV knowledge and information  
164 seeking before and during the study, acceptability of HPV testing, willingness to increase the  
165 screening interval, commencement screening age for HPV testing, attitudes and concerns about  
166 test positive results and communication needs around screening results, in addition to  
167 demographic details (SUPPLEMENTARY FILE). Responses included 7- and 5-point Likert

1  
2  
3 168 scales, and survey responses were linked to HPV FOCAL trial screen test results. Survey items  
4  
5 169 were based upon previous HPV FOCAL surveys assessing HPV testing acceptance [15] The  
6  
7 170 survey was distributed and managed using the web-based platform of Fluidsurveys  
8  
9 171 ([www.fluidsurveys.com](http://www.fluidsurveys.com)). The survey was pilot tested and revised for face and content validity  
10  
11 172 with approximately 20 women, aged 30 and above prior to distribution to FOCAL participants.  
12  
13  
14 173

### 15 174 **Patient and public involvement**

16 175 Patient concerns and questions raised during the trial period identified the need for the study,  
17  
18 176 but patients were not involved in the construction of the survey[16]. However, a sample of  
19  
20 177 women who undergo cervical cancer screening in BC were involved in pilot testing of the survey  
21  
22 178 for the purposes of face validity and survey flow and logistics. Based on this feedback, revisions  
23  
24 179 were made to the survey to clarify wording of questions and format of layout.  
25  
26  
27  
28  
29 180

### 30 181 **Response rate and inclusion criteria**

31 182 Participants from the HPV FOCAL trial from both the HPV and cytology arms who had  
32  
33 183 completed their study 48 month exit screen, had indicated consent to be contacted for future  
34  
35 184 research, and for whom email addresses were available were eligible for survey invitation. The  
36  
37 185 invite to complete the survey was sent via email, with one reminder sent a month later for those  
38  
39 186 who had not initiated or completed the survey. Participants were provided with a unique study  
40  
41 187 identifier to access the survey and no personal identifiers were captured during survey  
42  
43 188 completion. Participants were informed they had the option to complete none, some, or all of the  
44  
45 189 survey with completion of survey questions as indication of consent.  
46  
47  
48  
49  
50 190

51  
52 191 Survey completeness was reviewed, and duplicate surveys, where the same woman completed  
53  
54 192 all or some of the survey more than once, were identified. For those with a duplicate entry, the  
55  
56  
57  
58  
59  
60

1  
2  
3 193 first complete survey was used in the analysis with all other survey attempts discarded.  
4

5 194 Response rate (%) was the sum of completed surveys plus partial surveys, divided by the  
6

7 195 number of invitations sent to eligible valid email addresses, as per the American Association for  
8

9 196 Public Opinion Research guidelines[17]. Non-response included: refusals (clicked the survey  
10

11 197 link, but did not complete consent or any items), and those assumed eligible with no response  
12

13 198 received. Email addresses that were undeliverable were considered invalid and not included in  
14

15 199 the analysis.  
16

### 17 200 **Statistical analysis**

18 201 Survey respondents were compared to HPV FOCAL trial participants on age, study arm, and  
19

20 202 location of trial recruitment to explore if survey sample was representative of FOCAL trial  
21

22 203 population.  
23

24 204  
25

26 205 Our main outcome of HPV testing acceptability was assessed by response to the question  
27

28 206 “having an HPV test instead of a Pap to screen for cervical cancer is acceptable to me”, which  
29

30 207 was dichotomized from a 5-point Likert scale, with those reporting strongly agree or agree,  
31

32 208 categorized as ‘accepting’, and those reporting neutral, don’t know, disagree and strongly  
33

34 209 disagree as ‘not accepting’ of HPV testing. This categorization was chosen to capture those  
35

36 210 who were truly accepting and biased towards the null. Only complete surveys were included,  
37

38 211 with those who were missing or preferred not to answer excluded. Participants were classified  
39

40 212 as being HPV positive, if they received an HPV positive screening result at any point during their  
41

42 213 participation in the HPV FOCAL trial, otherwise a participant was classified as HPV negative.  
43

44 214  
45

46 215 Bivariable analysis explored differences in acceptability of HPV testing based on demographic  
47

48 216 factors such as age, income, and education, in addition to HPV screening test result, and  
49

50 217 length of time since study exit. Factors shown to be potentially associated with acceptability,  
51

52  
53

54  
55

56  
57

58  
59  
60



1  
2  
3 218 such as HPV screening starting at 30 years of age and increased screening interval, were also  
4  
5 219 examined[16,18,19].  
6

7 220  
8

9 221 Socio-demographics and attitudes towards HPV testing were explored descriptively with Chi-  
10  
11 222 square for categorical variables and median score test for continuous variables.  
12

13 223  
14

15 224 Multivariate logistic regression was used to explore the association of the acceptability of HPV  
16  
17 225 testing with *a priori* identified confounding variables that reached  $p \leq 0.2$  in bivariable analysis.  
18  
19 226 Level of significance was 0.05. All statistical analyses were performed in SAS 9.4 and R4.02.  
20  
21

22 227  
23

#### 24 228 **Ethics Approval**

25  
26 229 Ethics approvals for survey was received by the University of British Columbia Research Ethics  
27  
28 230 Board (H06-04032). In addition, a privacy review was undertaken to ensure the survey complied  
29  
30 231 with provincial privacy legislation.  
31

32 232  
33

#### 34 233 **RESULTS**

35  
36 234 Survey invites were administered from August 2017 through to February 2018. A total of 14,535  
37  
38 235 participants from both the HPV and cytology arms in HPV FOCAL trial were identified as eligible  
39  
40 236 to receive 48-months exit online survey, of which 13,176 were delivered to a valid email address  
41  
42 237 (FIGURE 1). There were 5,532 surveys completed, of which 4,938 were fully and 594 partially  
43  
44 238 completed.  
45

46 239  
47

48 240  
49

50 241  
51

52 242  
53

54 243  
55  
56  
57  
58  
59  
60

### 244 **Characteristics of respondents**

245 The median age of participants completing the survey was 54 years (IQR: 46,62) (Table 1). The  
246 median time of survey completion was 3 years after study exit. The majority of respondents  
247 (67%) had completed college or higher education and 77% reported living with a partner.  
248 Survey respondents were comparable to HPV FOCAL trial participants based on study arm, age  
249 at HPV FOCAL trial enrollment, and geographical location. Survey respondents and non-  
250 respondents were comparable by study arm and marital status, but those who responded to the  
251 survey were slightly older than non-responders (median of 51 years vs. 49 years), although the  
252 difference was not clinically significant.

253

254

### 255 **Acceptability of HPV testing for Screening**

256

257 Overall, 63% of survey respondents agreed or strongly agreed that HPV testing for cervical  
258 cancer screening was acceptable, with 37% not agreeing (11% disagree, 16% neutral, 10%  
259 don't know) (Table 1). There were no significant associations between acceptability of HPV  
260 testing and marital partnership status, time since study exit, education or income. Women who  
261 received an HPV positive result at any point during HPV FOCAL trial and who were older were  
262 more accepting of HPV testing compared to those who remained HPV negative during trial  
263 participation.

264

265 In multivariate analysis, women who reported HPV testing as acceptable were more likely to  
266 have received an HPV positive screen test result at some point during the trial (OR 1.41 95%CI  
267 1.11,1.80, p=0.005), and were older (OR 1.01, 95%CI 1.00,1.02, p=0.01) (Table 2).

268

1  
2  
3 269 Over half of respondents (54%) agreed with the statement “I would be willing to have an HPV  
4  
5 270 test every 4-5 years instead of a Pap every 3 years”. There was a significant difference in  
6  
7 271 acceptability of an extended screening interval between those who reported being accepting of  
8  
9 272 HPV testing compared to those who were not accepting. Overall, 69% responded that HPV  
10  
11 273 testing starting at age 30 was acceptable, with over 80% of those who were accepting of HPV  
12  
13 274 testing reporting agreement with a higher screening age (30 years or over) compared to Pap  
14  
15 275 testing (Table 1).  
16  
17

18 276  
19  
20 277 In addition, 66% of respondents reported that an extended screening would not result in less  
21  
22 278 visits to their healthcare provider for other medical reasons, indicating that despite the extended  
23  
24 279 interval recommended with HPV-based screening, women would continue to see their providers  
25  
26 280 for medical reasons as needed.  
27

28 281  
29

### 30 282 **Attitudes towards an HPV Positive Test Result:**

31  
32 283  
33  
34 284 Survey respondents were asked to rate their level of agreement with a variety of statements  
35  
36 285 regarding attitudes surrounding receipt of HPV positive results (Table 3). Women were asked if  
37  
38 286 they would be more concerned about receiving a positive HPV test or an abnormal Pap result,  
39  
40 287 for which most respondents (73%) reported that both screening outcomes would concern them  
41  
42 288 equally. However, those that reported HPV testing to be acceptable, reported that an HPV  
43  
44 289 positive result would concern them more (14%) than an abnormal Pap. This was statistically  
45  
46 290 different compared to those who were not accepting of HPV testing, who responded that  
47  
48 291 abnormal Pap test results would concern them more. The difference in distribution between  
49  
50 292 these responses was statistically significant.  
51  
52

53 293  
54  
55  
56  
57  
58  
59  
60

1  
2  
3 294 Most respondents who were not accepting of HPV testing indicated that having a sexually  
4  
5 295 acquired infection would concern them differently than having abnormal Pap results. The  
6  
7 296 relationship between level of agreement with HPV testing acceptability and ones' level of  
8  
9 297 concern about having a sexually acquired infection was significant. Regardless of a  
10  
11 298 respondent's reported HPV testing acceptability, most respondents felt it important to them to  
12  
13 299 know who gave them HPV and when they acquired HPV (72% and 78% respectively). Most  
14  
15 300 respondents indicated they disagreed or were neutral regarding feeling judged for having HPV,  
16  
17 301 and there was no significant relationship between feeling judged and level of agreement with  
18  
19 302 HPV testing. More respondents who were accepting of HPV testing indicated they would feel  
20  
21 303 comfortable telling their partner if they had HPV, which was in contrast to those who were not  
22  
23 304 accepting of HPV testing; these differences indicated a significant relationship between HPV  
24  
25 305 testing acceptance and comfort disclosing HPV status to a partner. Regardless of level of  
26  
27 306 agreement with HPV testing, most respondents (79%) indicated they would feel concerned  
28  
29 307 about transmitting HPV to their partner(s). More respondents who were accepting of HPV  
30  
31 308 testing would feel confident in the recommendations from their provider for the management of  
32  
33 309 their HPV positive results. There was a significant association between level of agreement with  
34  
35 310 HPV testing and degree of confidence with provider recommendations.  
36  
37  
38  
39  
40

#### 41 311 **Sources of information for HPV testing and screening:**

42  
43 313 Overall, the most reported important sources of information were health care providers and BC  
44  
45 314 Cancer, the agency that is responsible for the cervix screening program in British Columbia  
46  
47 315 (Table 4). In addition, those that are accepting of HPV testing were more likely to look to their  
48  
49 316 health care providers and BC Cancer as important sources of information. Regardless of one's  
50  
51 317 level of agreement with HPV testing for screening, friends and family or social media were not  
52  
53 318 as important as health care providers and BC Cancer for sources of information.  
54  
55  
56  
57  
58  
59  
60

**DISCUSSION**

321

322 Acceptability of, and attitudes, towards primary HPV testing were analysed from 5,532 women

323 who completed HPV testing as part of the HPV FOCAL trial, which was embedded within an

324 organized population-based cervical cancer screening program. Most respondents (63%) were

325 accepting of HPV testing for cervix screening and for screening with HPV testing to begin at age

326 30 (69%). Just over half were accepting of HPV testing with the extended screen interval of 4 to

327 5 years (54%). Although most women were accepting, the proportion of respondents indicating

328 they disagreed with or were neutral in their acceptance of HPV testing and of extended intervals

329 was higher than we expected considering this was a group of people who were provided with

330 education and information about HPV, HPV testing, and cervical cancer. These findings are

331 similar to other studies that indicate women have concerns about the extended interval

332 recommended with HPV testing [10,20–22], stemming from a belief that a cancer diagnosis may

333 be missed through extension of the interval. Considering study participants received information

334 regarding HPV, the natural history of HPV and cervical cancer, and the rationale for HPV testing

335 compared to the Pap test, these findings indicate that additional research and patient

336 engagement is needed to gain insights and identify and develop resources or procedures to

337 address barriers to HPV testing and an extended screening interval.

338

339 This multivariate analysis found that those who received positive HPV test results at some point

340 during the trial were more likely to be accepting of HPV testing for cervix screening than those

341 who never received an HPV positive result. Those who tested HPV positive would have

342 received additional information and counseling from their healthcare provider and or a Study

343 nurse, which would not necessarily have been provided to those who tested HPV negative. This

344 additional information would have reinforced the education participants were provided at trial

345 baseline, including the prevalence of HPV in the population, the transient nature of HPV and the

1  
2  
3 346 long natural history between HPV infection and cervical dysplasia development. In addition,  
4  
5 347 those with HPV positive results would have received additional follow-up and management by  
6  
7 348 the time the survey was administered. The reinforcement of education, an opportunity for  
8  
9 349 dialogue when receiving the positive result, and the fact that those with a positive HPV result  
10  
11 350 would have received treatment for detected dysplasia, may have facilitated improvement in  
12  
13 351 knowledge and subsequently, enhanced acceptance of HPV testing. Other findings have  
14  
15 352 indicated that increased HPV and HPV screening knowledge can be a facilitator of HPV  
16  
17 353 screening acceptance[18].  
18  
19  
20 354

21  
22 355 One of the concerns with an extended screening interval is if women would be less likely to  
23  
24 356 consult with the health care provider for other medical reasons[16]. When we asked participants  
25  
26 357 if they would be less willing to see a healthcare provider for other medical reasons if the interval  
27  
28 358 for cervix screening were increased, most respondents said they would not be less willing,  
29  
30 359 indicating that the extended interval for cervix screening would not prevent them from seeking  
31  
32 360 care as needed. This finding can provide reassurance to healthcare professionals who have  
33  
34 361 concerns that the extended screening interval recommended with HPV-based screening would  
35  
36 362 lead to fewer visits to a clinician, given that the cervical screen visit is often an opportunity for  
37  
38 363 the clinician to assess other preventive care or medical issues [23].  
39  
40  
41 364

42  
43 365 Respondents' concerns regarding receipt of HPV positive results were varied. Nearly 93% of the  
44  
45 366 respondents never received an HPV positive result during the HPV FOCAL trial. As a result, the  
46  
47 367 majority of responses evaluate attitudes and experiences for those who did not actually receive  
48  
49 368 HPV positive results, and therefore, reflect how the respondents would hypothetically feel if they  
50  
51 369 were to receive HPV positive results. Of the respondents, 7.5% had received an HPV positive  
52  
53 370 result at some point during their trial participation.  
54  
55  
56 371

1  
2  
3 372 Most participants indicated that having HPV would cause them concern about having cervical  
4  
5 373 cancer. The majority of participants reported that having either an abnormal Pap or a positive  
6  
7 374 HPV test would concern them; however, for those that had tested positive for HPV, they  
8  
9 375 reported that an HPV test would concern them more compared to an abnormal Pap. Overall,  
10  
11 376 participants' perceptions about HPV positive results and cervical cancer indicate that increased  
12  
13 377 knowledge regarding the specificity of HPV testing for cervical cancer screening is needed.  
14

15  
16 378  
17  
18 379 Receipt of positive HPV results has been associated with higher anxiety and distress compared  
19  
20 380 to receipt of abnormal Pap results[24–26], which may be due to the fact that HPV is a sexually  
21  
22 381 transmitted infection and has been associated with levels of shame and stigma[27,28]. Most  
23  
24 382 respondents in our survey indicated that receiving results for a sexually acquired HPV infection  
25  
26 383 would concern them differently than having an abnormal Pap test result; however, this belief  
27  
28 384 varied depending on a participant's acceptability of HPV testing. Women who were not  
29  
30 385 accepting of HPV testing indicated that a HPV positive result would concern them differently  
31  
32 386 than abnormal Pap results, compared to those who were accepting of HPV testing. Most  
33  
34 387 respondents, whether they accepted HPV testing or not, felt it important for them to know who  
35  
36 388 gave them HPV and when they got it (71% and 78% respectively). These findings together are  
37  
38 389 reflective of other research findings[9,29,30] and indicate that when developing education and  
39  
40 390 communication strategies, emphasis should be placed on the high prevalence of HPV in the  
41  
42 391 population, the transient nature of most HPV infections, bringing awareness to the fact an  
43  
44 392 infection may have been acquired several years prior to a positive test result. Differentiating  
45  
46 393 HPV from other STIs may minimize anxiety and facilitate normalization and acceptance[16,27].  
47  
48

49 394  
50  
51 395 Almost 75% of the respondents indicated they felt an HPV positive result would affect their  
52  
53 396 relationship with their partner, or they weren't sure, and almost 80% would be concerned about  
54  
55 397 transmitting HPV to their partners, with many feeling they would be judged for being HPV  
56  
57  
58  
59

1  
2  
3 398 positive. The stigma associated with HPV, concerns about infidelity and potential partner  
4  
5 399 reactions to the HPV result may underlie these concerns. Previous research has indicated some  
6  
7 400 women question whether partner notification with HPV is necessary[16,31]. Unlike other STIs  
8  
9 401 such as chlamydia or gonorrhoea where partner notification is recommended for testing and  
10  
11 402 treatment purposes, there is usually no medical reason to notify the partner of a woman who  
12  
13 403 tested positive for HPV.

14 404  
15  
16 405 Healthcare providers, as trusted and valued sources of information, can influence patients'  
17  
18 406 decision-making patterns regarding health care decisions[20,32] Reflecting other findings, the  
19  
20 407 respondents in this survey indicated that the most important sources of information for them,  
21  
22 408 were their healthcare providers and the provincial screening program [[20,32]]. In this cohort,  
23  
24 409 the least important sources of information were social media and friends and family, providing  
25  
26 410 reassurance that women in this cohort seek information from reputable sources such as health  
27  
28 411 care providers and the screening program compared to the internet, or friends and family.  
29  
30 412 These findings demonstrate that program planning for HPV-based screening should prepare  
31  
32 413 health care providers with adequate education and training surrounding HPV prior to program  
33  
34 414 changes, to ensure they are equipped to address women's questions and concerns regarding  
35  
36 415 the paradigm shift from cytology to HPV-based screening.

37 416  
38  
39 417 This study is not without limitations. Survey participants were part of a large clinical trial and  
40  
41 418 were given information about HPV, HPV testing and cervical cancer upon enrollment and,  
42  
43 419 therefore, may not be representative of all people eligible for cervix screening in British  
44  
45 420 Columbia. However, participants of this study are reflective of the current population engaged in  
46  
47 421 the screening program, who receive cytology testing with the Pap smear, and not HPV testing  
48  
49 422 as standard of care. As a result, their concerns and feedback are informative for programs  
50  
51 423 planning for a shift from cytology to HPV-based screening. The response rate may be  
52  
53  
54  
55  
56  
57  
58  
59  
60



1  
2  
3 424 considered low at 41%; however, those who have stronger opinions about their screening  
4  
5 425 choices may have been more likely to respond to the survey than those who are more trusting  
6  
7 426 of the health care system and accepting of any future policy changes. In addition, survey  
8  
9 427 respondents were representative of overall participants in the HPV FOCAL trial. The majority of  
10  
11 428 respondents completed the survey approximately 3 years after trial completion and it is possible  
12  
13 429 there was loss of recall of HPV related information provided to them when they consented to  
14  
15 430 participate in the trial, which for many was up to 7 years prior to survey completion. The  
16  
17 431 potential lag time between trial entry and survey completion may have introduced recall bias  
18  
19 432 and impacted women's attitudes and beliefs surrounding HPV testing; however, the impact of  
20  
21 433 this potential bias would be small as we found no significant difference between acceptability  
22  
23 434 and time between trial entry and survey completion. In addition, most of the participants in this  
24  
25 435 trial were over the age of 50, highly educated and primarily from two urban geographic regions  
26  
27 436 and may not be representative of all screen eligible people in various regions of British  
28  
29 437 Columbia.

30  
31  
32  
33 438

## 34 439 **CONCLUSIONS**

35  
36  
37 440

38  
39 441 In this study, within an organized screening setting, evaluating acceptability and attitudes  
40  
41 442 around HPV testing from women undergoing HPV-based screening, most are accepting of HPV  
42  
43 443 testing for screening; however, further research is needed to understand factors that can  
44  
45 444 increase acceptability. These findings contribute to the growing body of evidence demonstrating  
46  
47 445 that concerns and experiences surrounding HPV testing and receipt of HPV positive results are  
48  
49 446 complex and varied. As many cervix screening programs begin HPV-based screening and are  
50  
51 447 planning implementation strategies, attention to patient engagement to address potential  
52  
53 448 barriers will be important. As HPV-based screening becomes standard of care, it is plausible  
54  
55 449 that concerns with this paradigm shift will eventually be alleviated with increasing knowledge

1  
2  
3 450 and familiarity. These findings provide insight into areas of importance that should be  
4  
5 451 considered for development of education, information, and communication strategies.  
6  
7 452  
8  
9 453  
10  
11 454  
12  
13 455  
14  
15 456  
16 457

**Figure 1:** Study flowchart and participant disposition

17  
18 458  
19 459  
20 460  
21 461  
22 462  
23 463  
24 464  
25 465  
26 466  
27 467  
28 468  
29 469  
30 470  
31 471  
32 472  
33 473  
34 474  
35 475  
36 476  
37 477  
38 478  
39 479  
40 480  
41 481  
42 482  
43 483  
44 484  
45 485  
46 486  
47 487  
48 488  
49  
50  
51  
52  
53  
54  
55  
56  
57  
58  
59  
60

489 **Table 1: Demographic characteristics of respondents and bivariable analysis of acceptability of**  
 490 **HPV testing**  
 491

|                                                                                                                                                                                               |                                   | Having an HPV test instead of a Pap smear to screen for cervical cancer is acceptable to me |                                                 |                       |         |
|-----------------------------------------------------------------------------------------------------------------------------------------------------------------------------------------------|-----------------------------------|---------------------------------------------------------------------------------------------|-------------------------------------------------|-----------------------|---------|
|                                                                                                                                                                                               |                                   | Total (N)                                                                                   | Not acceptable<br>(Disagree/Neutral/Don't know) | Acceptable<br>(Agree) | p-value |
| <b>Total (N)</b>                                                                                                                                                                              |                                   | <b>5336</b>                                                                                 | 1993 (37.4%)                                    | 3343 (62.6%)          |         |
| <b>Age</b>                                                                                                                                                                                    | median [IQR]                      | 5336                                                                                        | 53.35 [45.35, 61.19]                            | 54.23 [45.64, 61.72]  | 0.051   |
| <b>Marital Status<sup>a</sup></b>                                                                                                                                                             |                                   |                                                                                             |                                                 |                       |         |
|                                                                                                                                                                                               | Living with a partner             | 3806                                                                                        | 1438 ( 78.7)                                    | 2368 ( 76.6)          | 0.095   |
|                                                                                                                                                                                               | Living without a partner          | 1115                                                                                        | 390 ( 21.3)                                     | 725 ( 23.4)           |         |
| <b>Education<sup>a</sup></b>                                                                                                                                                                  |                                   |                                                                                             |                                                 |                       |         |
|                                                                                                                                                                                               | Complete College or higher        | 3317                                                                                        | 1250 ( 68.5)                                    | 2067 ( 66.7)          | 0.221   |
|                                                                                                                                                                                               | Incomplete post-secondary or less | 1607                                                                                        | 576 ( 31.5)                                     | 1031 ( 33.3)          |         |
| <b>Income<sup>a</sup></b>                                                                                                                                                                     |                                   |                                                                                             |                                                 |                       |         |
|                                                                                                                                                                                               | Less than \$75000                 | 1501                                                                                        | 529 ( 32.0)                                     | 972 ( 34.0)           | 0.175   |
|                                                                                                                                                                                               | \$75,000 or more                  | 3014                                                                                        | 1126 ( 68.0)                                    | 1888 ( 66.0)          |         |
| <b>HPV Testing Status during FOCAL trial</b>                                                                                                                                                  |                                   |                                                                                             |                                                 |                       |         |
|                                                                                                                                                                                               | Never tested HPV positive         | 4937                                                                                        | 1867 ( 93.7)                                    | 3070 ( 91.8)          | 0.015*  |
|                                                                                                                                                                                               | At least one HPV positive result  | 399                                                                                         | 126 ( 6.3)                                      | 273 ( 8.2)            |         |
| <b>Time since exit from FOCAL trial, Years</b>                                                                                                                                                |                                   |                                                                                             |                                                 |                       |         |
|                                                                                                                                                                                               | median [IQR]                      | 5336                                                                                        | 3.09 [2.26, 3.91]                               | 3.04 [2.23, 3.93]     | 0.616   |
| <b>I would be willing to have an HPV test every 4-5 years instead of a Pap every 3 years<sup>a</sup></b>                                                                                      |                                   |                                                                                             |                                                 |                       |         |
|                                                                                                                                                                                               | Agree                             | 2858                                                                                        | 386 ( 19.5)                                     | 2472 ( 74.2)          | <0.001* |
|                                                                                                                                                                                               | Disagree                          | 1096                                                                                        | 744 ( 37.6)                                     | 352 ( 10.6)           |         |
|                                                                                                                                                                                               | Neutral                           | 1353                                                                                        | 847 ( 42.8)                                     | 506 ( 15.2)           |         |
| <b>Receiving HPV testing starting at age 30 is acceptable to me<sup>a</sup></b>                                                                                                               |                                   |                                                                                             |                                                 |                       |         |
|                                                                                                                                                                                               | Agree                             | 3635                                                                                        | 944 ( 47.8)                                     | 2691 ( 81.0)          | <0.001* |
|                                                                                                                                                                                               | Disagree                          | 682                                                                                         | 423 ( 21.4)                                     | 259 ( 7.8)            |         |
|                                                                                                                                                                                               | Neutral                           | 981                                                                                         | 608 ( 30.8)                                     | 373 ( 11.2)           |         |
| <b>If cervical cancer screening was to occur every 4 or 5 years, instead of every 3 years, I would be less likely to visit my health care provider for other health reasons. <sup>a</sup></b> |                                   |                                                                                             |                                                 |                       |         |
|                                                                                                                                                                                               | Agree                             | 1062                                                                                        | 405 ( 20.4)                                     | 657 ( 19.7)           | 0.814   |
|                                                                                                                                                                                               | Disagree                          | 3517                                                                                        | 1303 ( 65.7)                                    | 2214 ( 66.4)          |         |
|                                                                                                                                                                                               | Neutral                           | 735                                                                                         | 274 ( 13.8)                                     | 461 ( 13.8)           |         |

Table Notes: <sup>a</sup> Missing values up to 5,336 = not reported or prefer not to answer, \* significant to p<0.05

492

493

494

495

1  
2  
3 496  
4 497  
5 498  
6 499  
7 500  
8 501  
9 502  
10 503  
11  
12  
13  
14  
15  
16  
17  
18  
19  
20  
21  
22  
23  
24  
25  
26  
27  
28  
29  
30  
31  
32  
33  
34  
35  
36  
37  
38  
39  
40  
41  
42  
43  
44  
45  
46  
47  
48  
49  
50  
51  
52  
53  
54  
55  
56  
57  
58  
59  
60

For peer review only

504 **Table 2:** Multivariate analysis of predictors for participants who are accepting of HPV testing  
 505 instead of Pap testing for cervical cancer screening.  
 506

| Variable                                                                    | OR (95% CI)      | P-value |
|-----------------------------------------------------------------------------|------------------|---------|
| Age at survey completion (years)                                            | 1.01 (1.00,1.02) | 0.01    |
| Received HPV positive results during study (Yes vs No)                      | 1.41 (1.11,1.80) | 0.005   |
| Education (Incomplete post-secondary or less vs Complete College or higher) | 1.06 (0.93,1.21) | 0.41    |
| Marital status (Living without a partner vs Living with a partner)          | 1.04 (0.88,1.22) | 0.67    |
| Income (\$75000 or more vs. less than \$75000)                              | 0.97 (0.84,1.12) | 0.68    |

507  
 508  
 509  
 510

512 **Table 3:** Experiences receiving HPV positive results

|                                                                                                                                           | HPV testing instead of Pap testing for cervical cancer: |                |              | p-value |
|-------------------------------------------------------------------------------------------------------------------------------------------|---------------------------------------------------------|----------------|--------------|---------|
|                                                                                                                                           | Total (N)                                               | Not acceptable | Acceptable   |         |
|                                                                                                                                           | 5336                                                    | 1993 (36.0%)   | 3343 (60.4%) |         |
| <b>What would concern you most: Being told you had abnormal Pap results, or being told you had HPV?<sup>a</sup></b>                       |                                                         |                |              |         |
| Being told I have abnormal Pap test results                                                                                               | 668                                                     | 274 (14.0)     | 394 (11.9)   | <0.001* |
| Being told I have HPV                                                                                                                     | 683                                                     | 197 (10.0)     | 486 (14.7)   |         |
| Both would concern me equally                                                                                                             | 3855                                                    | 1464 (74.7)    | 2391 (72.2)  |         |
| Neither would concern me                                                                                                                  | 67                                                      | 26 (1.3)       | 41 (1.2)     |         |
| <b>Having an infection that is sexually acquired (HPV) doesn't concern me any differently than abnormal Pap results would<sup>a</sup></b> |                                                         |                |              |         |
| Agree                                                                                                                                     | 1412                                                    | 442 (24.8)     | 970 (31.5)   | <0.001* |
| Disagree                                                                                                                                  | 2465                                                    | 974 (54.6)     | 1491 (48.4)  |         |
| Neutral                                                                                                                                   | 987                                                     | 369 (20.7)     | 618 (20.1)   |         |
| <b>It would be important for me to know who gave me HPV<sup>a</sup></b>                                                                   |                                                         |                |              |         |
| Agree                                                                                                                                     | 3468                                                    | 1251 (70.3)    | 2217 (71.7)  | 0.094   |
| Disagree                                                                                                                                  | 545                                                     | 188 (10.6)     | 357 (11.5)   |         |
| Neutral                                                                                                                                   | 859                                                     | 340 (19.1)     | 519 (16.8)   |         |
| <b>It would be important for me to know when I got HPV<sup>a</sup></b>                                                                    |                                                         |                |              |         |
| Agree                                                                                                                                     | 3795                                                    | 1372 (76.9)    | 2423 (78.3)  | 0.131   |
| Disagree                                                                                                                                  | 432                                                     | 151 (8.5)      | 281 (9.1)    |         |
| Neutral                                                                                                                                   | 650                                                     | 260 (14.6)     | 390 (12.6)   |         |
| <b>I think people would judge me for having HPV<sup>a</sup></b>                                                                           |                                                         |                |              |         |
| Agree                                                                                                                                     | 1775                                                    | 663 (37.4)     | 1112 (36.0)  | 0.307   |
| Disagree                                                                                                                                  | 1419                                                    | 495 (27.9)     | 924 (30.0)   |         |
| Neutral                                                                                                                                   | 1666                                                    | 617 (34.8)     | 1049 (34.0)  |         |
| <b>I would feel comfortable telling my partner if I had HPV<sup>a</sup></b>                                                               |                                                         |                |              |         |
| Agree                                                                                                                                     | 3391                                                    | 1198 (67.4)    | 2193 (71.3)  | 0.016*  |
| Disagree                                                                                                                                  | 709                                                     | 284 (16.0)     | 425 (13.8)   |         |
| Neutral                                                                                                                                   | 755                                                     | 296 (16.6)     | 459 (14.9)   |         |
| <b>I would not be concerned about transmitting HPV to my partner<sup>a</sup></b>                                                          |                                                         |                |              |         |
| Agree                                                                                                                                     | 515                                                     | 174 (9.8)      | 341 (11.1)   | 0.095   |
| Disagree                                                                                                                                  | 3825                                                    | 1400 (78.7)    | 2425 (79.0)  |         |
| Neutral                                                                                                                                   | 509                                                     | 205 (11.5)     | 304 (9.9)    |         |
| <b>Being HPV positive would not affect my relationship with my partner<sup>a</sup></b>                                                    |                                                         |                |              |         |
| Agree                                                                                                                                     | 1249                                                    | 445 (25.1)     | 804 (26.3)   | 0.035*  |
| Disagree                                                                                                                                  | 2003                                                    | 708 (39.9)     | 1295 (42.3)  |         |
| Neutral                                                                                                                                   | 1584                                                    | 622 (35.0)     | 962 (31.4)   |         |
| <b>Having HPV would not cause me any concern about cervical cancer<sup>a</sup></b>                                                        |                                                         |                |              |         |
| Agree                                                                                                                                     | 181                                                     | 52 (2.9)       | 129 (4.2)    | 0.012*  |
| Disagree                                                                                                                                  | 4112                                                    | 1499 (84.1)    | 2613 (84.8)  |         |
| Neutral                                                                                                                                   | 569                                                     | 231 (13.0)     | 338 (11.0)   |         |
| <b>I would feel confident in the recommendations from my healthcare provider for follow-up of my HPV positive result<sup>a</sup></b>      |                                                         |                |              |         |
| Agree                                                                                                                                     | 3876                                                    | 1323 (74.0)    | 2553 (82.5)  | <0.001* |
| Disagree                                                                                                                                  | 226                                                     | 97 (5.4)       | 129 (4.2)    |         |

1  
2  
3  
4  
5  
6  
7  
8  
9  
10  
11  
12  
13  
14  
15  
16  
17  
18  
19  
20  
21  
22  
23  
24  
25  
26  
27  
28  
29  
30  
31  
32  
33  
34  
35  
36  
37  
38  
39  
40  
41  
42  
43  
44  
45  
46  
47  
48  
49  
50  
51  
52  
53  
54  
55  
56  
57  
58  
59  
60

|         |     |            |            |
|---------|-----|------------|------------|
| Neutral | 780 | 369 (20.6) | 411 (13.3) |
|---------|-----|------------|------------|

Table Notes: : <sup>a</sup> Missing values up to 5,336 = not reported or prefer not to answer,, \* significant to p<0.05

513  
514

For peer review only

515 **Table 4: Important sources of HPV information**

|                                                                                            |               |           | Having an HPV test instead of a Pap smear to screen for cervical cancer is acceptable to me |              |         |
|--------------------------------------------------------------------------------------------|---------------|-----------|---------------------------------------------------------------------------------------------|--------------|---------|
|                                                                                            |               | Total (N) | Not acceptable                                                                              | Acceptable   | p-value |
|                                                                                            |               | 5336      | 1993 (36.0%)                                                                                | 3343 (60.4%) |         |
| <b>Health Care Provider<sup>a</sup></b>                                                    |               |           |                                                                                             |              |         |
|                                                                                            | Important     | 3405      | 1128 ( 59.3)                                                                                | 2277 ( 70.1) | <0.001* |
|                                                                                            | Neutral       | 1256      | 560 ( 29.5)                                                                                 | 696 ( 21.4)  |         |
|                                                                                            | Not Important | 487       | 213 ( 11.2)                                                                                 | 274 ( 8.4)   |         |
| <b>BC Cancer (organizes screening in BC)<sup>a</sup></b>                                   |               |           |                                                                                             |              |         |
|                                                                                            | Important     | 2713      | 907 ( 48.7)                                                                                 | 1806 ( 56.9) | <0.001* |
|                                                                                            | Neutral       | 1649      | 673 ( 36.1)                                                                                 | 976 ( 30.8)  |         |
|                                                                                            | Not Important | 673       | 283 ( 15.2)                                                                                 | 390 ( 12.3)  |         |
| <b>Govt Websites (ex: Canadian Cancer Society/Public Health Agency Canada)<sup>a</sup></b> |               |           |                                                                                             |              |         |
|                                                                                            | Important     | 2111      | 734 ( 39.9)                                                                                 | 1377 ( 44.2) | 0.011*  |
|                                                                                            | Neutral       | 1914      | 748 ( 40.6)                                                                                 | 1166 ( 37.5) |         |
|                                                                                            | Not Important | 928       | 359 ( 19.5)                                                                                 | 569 ( 18.3)  |         |
| <b>Other websites (WebMd, blogs)<sup>a</sup></b>                                           |               |           |                                                                                             |              |         |
|                                                                                            | Important     | 1597      | 567 ( 31.3)                                                                                 | 1030 ( 33.7) | 0.112   |
|                                                                                            | Neutral       | 1997      | 776 ( 42.8)                                                                                 | 1221 ( 40.0) |         |
|                                                                                            | Not Important | 1273      | 469 ( 25.9)                                                                                 | 804 ( 26.3)  |         |
| <b>Friends/family<sup>a</sup></b>                                                          |               |           |                                                                                             |              |         |
|                                                                                            | Important     | 1336      | 453 ( 25.0)                                                                                 | 883 ( 28.9)  | 0.012*  |
|                                                                                            | Neutral       | 1865      | 725 ( 40.0)                                                                                 | 1140 ( 37.3) |         |
|                                                                                            | Not Important | 1670      | 634 ( 35.0)                                                                                 | 1036 ( 33.9) |         |
| <b>Social media<sup>a</sup></b>                                                            |               |           |                                                                                             |              |         |
|                                                                                            | Important     | 580       | 197 ( 10.9)                                                                                 | 383 ( 12.6)  | 0.004*  |
|                                                                                            | Neutral       | 1562      | 633 ( 35.1)                                                                                 | 929 ( 30.7)  |         |
|                                                                                            | Not Important | 2693      | 975 ( 54.0)                                                                                 | 1718 ( 56.7) |         |

Table Notes : <sup>a</sup> Missing values up to 5,336 = not reported or prefer not to answer,, \* significant to p<0.05

516  
517  
518  
519  
520  
521  
522  
523  
524  
525  
526  
527



1  
2  
3 528

4 529 **Acknowledgements:** We thank the thousands of women of BC who participated in the HPV  
5 530 FOCAL Trial and completed this survey, and the hundreds of BC collaborating clinicians. We  
6 531 also extend gratitude to many partners including: The BC Cancer Cervix Screening and  
7 532 Colposcopy Program; the BC Centre for Disease Control Public Health Laboratory; the  
8 533 University of British Columbia; BC Cancer Surveillance and Outcomes Unit; Women's Health  
9 534 Research Institute; and the Canadian Institutes of Health Research.

10 535

11 536 **Contributors:** LWS involved in conception, design and implementation of the research  
12 537 presented here, drafting and review of manuscript; CSR conducted statistical analysis and  
13 538 contributed to drafting and review of manuscript; LG conducted statistical analysis; MK, ML,  
14 539 REM, GS, SP ELF and DV are co-investigators on the HPV FOCAL Study and were involved in  
15 540 FOCAL trial design and trial management; AJC and GO are co-principal investigators of the  
16 541 FOCAL Study and oversaw conduct of the trial; all authors take responsibility for the credibility  
17 542 of the data and analysis and critically reviewed the paper and approved the final version.

18 543

19 544 **Funding:** This work was supported by the Canadian Institutes for Health Research. MCT-  
20 545 82072. CSR is supported by a Michael Smith Foundation for Health Research Fellowship.

21 546

22 547 **Competing interests:** MK and AC were principal investigators, and GO, DV and EF were co-  
23 548 investigators on industry funded (Hologic Inc, and Roche) investigator-led adjunct studies to the  
24 549 HPV FOCAL Trial, designed to compare the performance of different HPV testing assays. No  
25 550 investigators personally benefitted financially. Funding for these adjunct studies was not applied  
26 551 to the operation of the HPV FOCAL results presented in this paper. ELF served as an  
27 552 occasional advisor for companies involved with HPV vaccines (Merck, GSK) and HPV  
28 553 diagnostics (Roche). He also holds a patent "DNA methylation markers for early  
29 554 detection of cervical cancer," registered at the Office of Innovation and Partnerships,  
30 555 McGill University, Montreal, Quebec, Canada.

31 556

32 557 **Patient consent for publication:** Not required

33 558

34 559 **Ethics approval:** Ethics approvals for survey was received by the University of British Columbia  
35 560 Research Ethics Board (H06-04032).

36 561

37 562 **Provenance and Peer review:** Not commissioned; externally peer reviewed.

38 563

39 564 **Data availability Statement:** Deidentified participant data is available upon consideration and  
40 565 reasonable request.

41 566

42 567

43 568

44 569

45 570

46 571

47 572

48 573

49 574

50 575

51

52

53

54

55

56

57

58

59

## REFERENCES

- 1  
2  
3 577  
4 578  
5 579 1 Walboomers JMM, Jacobs M v., Manos MM, *et al.* Human papillomavirus is a necessary  
6 580 cause of invasive cervical cancer worldwide. *Journal of Pathology* 1999;**189**:12–9.  
7 581 doi:10.1002/(SICI)1096-9896(199909)189:1<12::AID-PATH431>3.0.CO;2-F  
8 582 2 Castellsagué X. Natural history and epidemiology of HPV infection and cervical cancer.  
9 583 *Gynecologic Oncology* 2008;**110**. doi:10.1016/j.ygyno.2008.07.045  
10 584 3 Ogilvie GS, van Niekerk D, Krajden M, *et al.* Effect of screening with primary cervical HPV  
11 585 testing vs cytology testing on high-grade cervical intraepithelial neoplasia at 48 months:  
12 586 The HPV FOCAL randomized clinical trial. *JAMA - Journal of the American Medical*  
13 587 *Association* 2018;**320**:43–52. doi:10.1001/jama.2018.7464  
14 588 4 Melnikow J, Henderson JT, Burda BU, *et al.* Screening for cervical cancer with high-risk  
15 589 human papillomavirus testing updated evidence report and systematic review for the us  
16 590 preventive services task force. *JAMA - Journal of the American Medical Association*  
17 591 2018;**320**:687–705. doi:10.1001/jama.2018.10400  
18 592 5 Ronco G, Dillner J, Elfström KM, *et al.* Efficacy of HPV-based screening for prevention of  
19 593 invasive cervical cancer: Follow-up of four European randomised controlled trials. *The*  
20 594 *Lancet* 2014;**383**:524–32. doi:10.1016/S0140-6736(13)62218-7  
21 595 6 Arbyn M, Ronco G, Anttila A, *et al.* Evidence regarding human papillomavirus testing in  
22 596 secondary prevention of cervical cancer. *Vaccine*. 2012;**30**.  
23 597 doi:10.1016/j.vaccine.2012.06.095  
24 598 7 Dijkstra MG, van Zummeren M, Rozendaal L, *et al.* Safety of extending screening intervals  
25 599 beyond five years in cervical screening programmes with testing for high risk human  
30 600 papillomavirus: 14 year follow-up of population based randomised cohort in the  
31 601 Netherlands. *BMJ (Clinical research ed)* 2016;**355**:i4924. doi:10.1136/bmj.i4924  
32 602 8 McBride E, Marlow LAV, Forster AS, *et al.* Anxiety and distress following receipt of results  
33 603 from routine HPV primary testing in cervical screening: The psychological impact of  
34 604 primary screening (PIPS) study. *International Journal of Cancer* 2020;**146**:2113–21.  
35 605 doi:10.1002/ijc.32540  
36 606 9 Bennett KF, Waller J, Ryan M, *et al.* The psychosexual impact of testing positive for high-  
37 607 risk cervical human papillomavirus (HPV): A systematic review. *Psycho-Oncology*.  
38 608 2019;**28**:1959–70. doi:10.1002/pon.5198  
39 609 10 Obermair HM, Dodd RH, Bonner C, *et al.* It has saved thousands of lives, so why change  
40 610 it?' Content analysis of objections to cervical screening programme changes in Australia.  
41 611 *BMJ Open* 2018;**8**. doi:10.1136/bmjopen-2017-019171  
42 612 11 Ogilvie GS, van Niekerk DJ, Krajden M, *et al.* A randomized controlled trial of Human  
43 613 Papillomavirus (HPV) testing for cervical cancer screening: Trial design and preliminary  
44 614 results (HPV FOCAL Trial). *BMC Cancer* 2010;**10**. doi:10.1186/1471-2407-10-111  
45 615 12 Ogilvie GS, Krajden M, van Niekerk DJ, *et al.* Primary cervical cancer screening with HPV  
46 616 testing compared with liquid-based cytology: results of round 1 of a randomised  
47 617 controlled trial -- the HPV FOCAL Study. *British journal of cancer* 2012;**107**:1917–24.  
48 618 doi:10.1038/bjc.2012.489  
49  
50  
51  
52  
53  
54  
55  
56  
57  
58  
59  
60

- 1  
2  
3 619 13 Coldman AJ, Gondara L, Smith LW, *et al.* Disease detection and resource use in the safety  
4 620 and control arms of the HPV FOCAL cervical cancer screening trial. *British journal of*  
5 621 *cancer* 2016;**115**:1487–94. doi:10.1038/bjc.2016.368  
6  
7 622 14 Ogilvie GS, Krajden M, van Niekerk D, *et al.* HPV for cervical cancer screening (HPV  
8 623 FOCAL): Complete Round 1 results of a randomized trial comparing HPV-based primary  
9 624 screening to liquid-based cytology for cervical cancer. *International journal of cancer*  
10 625 2017;**140**:440–8. doi:10.1002/ijc.30454  
11  
12 626 15 Ogilvie GS, Smith LW, van Niekerk DJ, *et al.* Women’s intentions to receive cervical  
13 627 cancer screening with primary human papillomavirus testing. *International Journal of*  
14 628 *Cancer* 2013;**133**:2934–43. doi:10.1002/ijc.28324  
15  
16 629 16 Smith L, van Niekerk D, Coldman A, *et al.* Recommendations for Implementing Human  
17 630 Papillomavirus-Based Cervical Cancer Screening: Lessons Learned from the HPV FOCAL  
18 631 Trial. *Journal of obstetrics and gynaecology Canada : JOGC = Journal d’obstetrique et*  
19 632 *gynecologie du Canada : JOGC* 2016;**38**:723–6. doi:10.1016/j.jogc.2016.04.009  
20  
21 633 17 The American Association for Public Opinion Research. Standard Definitions: Final  
22 634 dispositions of case codes and outcome rates for surveys. 9th Edition. 2016.  
23 635 18 Tatar O, Thompson E, Naz A, *et al.* Factors associated with human papillomavirus (HPV)  
24 636 test acceptability in primary screening for cervical cancer: A mixed methods research  
25 637 synthesis. *Preventive Medicine*. 2018;**116**:40–50. doi:10.1016/j.ypmed.2018.08.034  
26  
27 638 19 Ogilvie GS, Smith LW, van Niekerk D, *et al.* Correlates of women’s intentions to be  
28 639 screened for human papillomavirus for cervical cancer screening with an extended  
29 640 interval. *BMC Public Health* 2016;**16**. doi:10.1186/s12889-016-2865-8  
30  
31 641 20 Dodd RH, Mac OA, McCaffery KJ. Women’s experiences of the renewed National Cervical  
32 642 Screening Program in Australia 12 months following implementation: a qualitative study.  
33 643 *BMJ open* 2020;**10**:e039041. doi:10.1136/bmjopen-2020-039041  
34  
35 644 21 Silver MI, Rositch AF, Burke AE, *et al.* Patient concerns about human papillomavirus  
36 645 testing and 5-year intervals in routine cervical cancer screening. *Obstetrics and*  
37 646 *Gynecology* 2015;**125**:317–29. doi:10.1097/AOG.0000000000000638  
38  
39 647 22 Gerend MA, Shepherd MA, Kaltz EA, *et al.* Understanding women’s hesitancy to undergo  
40 648 less frequent cervical cancer screening. *Preventive Medicine* 2017;**95**:96–102.  
41 649 doi:10.1016/j.ypmed.2016.11.028  
42  
43 650 23 Saraiya M, Berkowitz Z, Yabroff KR, *et al.* Cervical cancer screening with both human  
44 651 papillomavirus and papanicolaou testing vs papanicolaou testing alone: What screening  
45 652 intervals are physicians recommending? *Archives of Internal Medicine* 2010;**170**:977–86.  
46 653 doi:10.1001/archinternmed.2010.134  
47  
48 654 24 McBride E, Tatar O, Rosberger Z, *et al.* Emotional response to testing positive for human  
49 655 papillomavirus at cervical cancer screening: a mixed method systematic review with  
50 656 meta-analysis. *Health Psychology Review* 2020;:1–35.  
51 657 doi:10.1080/17437199.2020.1762106  
52  
53 658 25 Dodd RH, Mac O, Brotherton JML, *et al.* Levels of anxiety and distress following receipt of  
54 659 positive screening tests in Australia’s HPV-based cervical screening programme: A cross-  
55 660 sectional survey. *Sexually Transmitted Infections*. 2020;**96**:166–72. doi:10.1136/sextrans-  
56 661 2019-054290  
57  
58  
59  
60

- 1  
2  
3 662 26 McCaffery K, Waller J, Forrest S, *et al*. Testing positive for human papillomavirus in  
4 663 routine cervical screening: Examination of psychosocial impact. *BJOG: An International*  
5 664 *Journal of Obstetrics and Gynaecology*. 2004;**111**:1437–43. doi:10.1111/j.1471-  
6 665 0528.2004.00279.x  
7  
8 666 27 Waller J, v Marlow LA, Wardle J, *et al*. The association between knowledge of HPV and  
9 667 feelings of stigma, shame and anxiety. *Sex Transm Infect* 2007;**83**:155–9.  
10 668 doi:10.1136/sti.2006.023333  
11  
12 669 28 Shepherd MA, Gerend MA. The blame game: Cervical cancer, knowledge of its link to  
13 670 human papillomavirus and stigma. *Psychology and Health* 2014;**29**:94–109.  
14 671 doi:10.1080/08870446.2013.834057  
15  
16 672 29 Kosenko KA, Hurley RJ, Harvey JA. Sources of the uncertainty experienced by women  
17 673 with HPV. *Qualitative Health Research* 2012;**22**:534–45. doi:10.1177/1049732311424404  
18 674 30 Patel H, Moss EL, Sherman SM. HPV primary cervical screening in England: Women’s  
19 675 awareness and attitudes. *Psycho-Oncology* 2018;**27**:1559–64. doi:10.1002/pon.4694  
20 676 31 Bennett KF, Waller J, Ryan M, *et al*. Concerns about disclosing a high-risk cervical human  
21 677 papillomavirus (HPV) infection to a sexual partner: A systematic review and thematic  
22 678 synthesis. *BMJ Sexual and Reproductive Health*. 2019. doi:10.1136/bmjsex-2019-200503  
23  
24 679 32 Rahman M, Laz TH, McGrath CJ, *et al*. Provider recommendation mediates the  
25 680 relationship between parental human papillomavirus (HPV) vaccine awareness and HPV  
26 681 vaccine initiation and completion among 13- to 17-year-old US adolescent children.  
27 682 *Clinical Pediatrics* 2015;**54**:371–5. doi:10.1177/0009922814551135  
28  
29 683  
30 684  
31 685

Figure 1: Study Flowchart and participant disposition



ew only

1  
2 Thank you for contributing to the HPV FOCAL Study! As you know the purpose of the study was to  
3 evaluate HPV testing for cervical cancer screening in BC. The results of the FOCAL study will be very  
4 important as Canadian programs consider adopting HPV testing to screen for changes that may lead to  
5 cervical cancer. We are interested to learn about your experience and understanding of HPV testing  
6 for cervical cancer screening. \*\*\*As a reminder, ALL women who completed a 4 year exit screen  
7 received both a Pap smear and an HPV test\*\*\*  
8  
9

10 Your input is important to us and can help plan for the future of cervical cancer screening in BC. Please  
11 take a few moments of your time to complete the attached survey. You do not have to answer any  
12 questions you do not feel comfortable answering.  
13  
14

---

15 First we would like to ask about your HPV knowledge before and during the study.

16  
17  
18 **1) Please rate the following question according to how much you agree or disagree with the statement:**  
19 **I know more about HPV and cervical cancer now than I did before I participated in the study:**

- 20  
21  
22  Strongly Disagree  
23  Disagree  
24  Neutral  
25  Agree  
26  Strongly agree  
27  Not Sure

28  
29  
30  
31  
32 **2) I was aware of my cervical screen (Pap and HPV test) results at completion of the study:**

- 33  
34  No  
35  Yes  
36  Not sure

37  
38  
39  
40 **3) Please rate the following question according to how much you agree or disagree with the statement:**  
41 **I had enough time to ask my health care provider questions about HPV testing and/or my results.**

- 42  
43  
44  Strongly Disagree  
45  Disagree  
46  Neutral  
47  Agree  
48  Strongly agree  
49  Don't know  
50  Not applicable

51  
52  
53  
54  
55  
56 CTRL IA Exit Survey 12June2017

- 1  
2  
3  
4  
5  
6  
7  
8  
9  
10  
11  
12  
13  
14  
15  
16  
17
- 4) Please rate the following question according to how much you agree or disagree with the statement:  
**I feel my health care provider was able to answer my questions about HPV:**

- 18  
19  
20  
21  
22  
23
- Strongly Disagree  
 Disagree  
 Neutral  
 Agree  
 Strongly agree  
 Don't know  
 Not applicable

- 24  
25  
26  
27  
28  
29  
30  
31  
32  
33  
34  
35  
36  
37  
38  
39  
40  
41  
42  
43  
44  
45  
46  
47  
48  
49  
50  
51  
52  
53  
54  
55
- 5) Please rate the following statements regarding HPV testing:

**Having my health care provider collect a sample for HPV testing for cervical cancer screening would be:**

|                   | <---                     | <--                      | <-                       | Neutral                  | ->                       | -->                      | --->                     |                |
|-------------------|--------------------------|--------------------------|--------------------------|--------------------------|--------------------------|--------------------------|--------------------------|----------------|
| Accurate          | <input type="checkbox"/> | Inaccurate     |
| Safe              | <input type="checkbox"/> | Unsafe         |
| Protect my health | <input type="checkbox"/> | Harm my health |
| Acceptable        | <input type="checkbox"/> | Unacceptable   |

6) Which of the following have been important sources of information for you about HPV/HPV testing?

|                                                                                                                         | Not at all important     | Not that important       | Neutral                  | Somewhat important       | Very important           |
|-------------------------------------------------------------------------------------------------------------------------|--------------------------|--------------------------|--------------------------|--------------------------|--------------------------|
| My health care provider                                                                                                 | <input type="checkbox"/> |
| BC Cancer Agency (including the BC Cancer Agency website)                                                               | <input type="checkbox"/> |
| Government websites (ie: Canadian Cancer Society, Health Canada, Public Health Agency of Canada, BC Ministry of Health) | <input type="checkbox"/> |
| Other websites (ie: WebMD, blogs, etc)                                                                                  | <input type="checkbox"/> |
| Friends/family                                                                                                          | <input type="checkbox"/> |
| Social Media (ie: facebook, twitter, etc)                                                                               | <input type="checkbox"/> |

Other comments:.....  
 .....



Next we would like to ask how you feel about HPV testing to screen for cervical cancer.

*As a reminder, there are over 100 types of the human papillomavirus (HPV), of which about 40 affect the genital region. HPV is very common and most sexually active people will have an infection at some point in their lives, however it usually disappears without a person experiencing any symptoms. Only in cases where a cancer causing HPV type persists for many years, is there a risk that it may lead to cervical cancer.*

**7) Please rate the following question according to how much you agree or disagree with the statement:  
Having an HPV test to screen for cervical cancer instead of a Pap smear is acceptable to me:**

- Strongly Disagree
- Disagree
- Neutral
- Agree
- Strongly agree
- Don't know

Comments:.....

**8) I would be willing to have an HPV test every 4 or 5 years instead of a Pap test every 3 years:**

- Strongly Disagree
- Disagree
- Neutral
- Agree
- Strongly agree
- Don't know

Comments: .....

Evidence suggests that HPV testing is ideally started no earlier than 30 years of age. Should HPV testing be adopted in the province, it would be available for women starting at age 30 or 35. However, cervical cancer screening could still start at age 25 using the Pap smear as currently recommended in BC.

**9) Receiving HPV testing for cervical cancer screening, starting at age 30 is acceptable to me.**

- Strongly Disagree
- Disagree
- Neutral
- Agree
- Strongly agree
- Don't know

**10) If cervical cancer screening was to occur every 4 or 5 years, instead of every 3 years, I would be less likely to visit my health care provider for other health reasons.**

- Strongly Disagree
- Disagree
- Neutral
- Agree
- Strongly agree
- Don't know

Next we would like to understand some of your thoughts about HPV testing compared to the Pap test.

**11) What would concern you most: 1) being told you had "abnormal Pap test results" or 2) being told you were "positive for HPV"? (Check ONE only)**

- Neither would concern me
- Being told I have abnormal Pap test results
- Being told I have HPV
- Both would concern me equally

Please explain: .....

.....

CTRL IA Exit Survey 12June2017

Next, we would like to learn about your experience of receiving HPV results.

**12) If you tested HPV positive during the HPV FOCAL trial, or if you were to test positive for HPV, please rate your level of agreement with the following statements:**

|                                                                                                                                                       | Strongly disagree        | Disagree                 | Neutral/uncertain        | Agree                    | Strongly Agree           |
|-------------------------------------------------------------------------------------------------------------------------------------------------------|--------------------------|--------------------------|--------------------------|--------------------------|--------------------------|
| Although HPV is sexually acquired, having an infection that is sexually acquired does not concern me any differently than abnormal Pap results would. | <input type="checkbox"/> |
| It would be important for me to know who gave me HPV.                                                                                                 | <input type="checkbox"/> |
| It would be important to me to determine when I got HPV.                                                                                              | <input type="checkbox"/> |
| I think people might judge me for having HPV.                                                                                                         | <input type="checkbox"/> |
| I would feel comfortable telling my partner about my HPV positive result.                                                                             | <input type="checkbox"/> |
| I would not be concerned about transmitting HPV to a sexual partner.                                                                                  | <input type="checkbox"/> |
| Receiving a positive HPV result would not affect my relationship with my sexual partner.                                                              | <input type="checkbox"/> |
| Having HPV would not cause me any concern about developing cervical cancer.                                                                           | <input type="checkbox"/> |
| I would feel confident in the follow up and/or treatment my provider would recommend for my positive HPV result.                                      | <input type="checkbox"/> |

CTRL IA Exit Survey 12June2017

Other comments:.....  
 .....

**13) Please rate the following statements according to how much you agree or disagree:**

**If I tested positive for HPV I felt/would feel:**

|           | <b>Strongly disagree</b> | <b>Disagree</b>          | <b>Neutral/uncertain</b> | <b>Agree</b>             | <b>Strongly agree</b>    |
|-----------|--------------------------|--------------------------|--------------------------|--------------------------|--------------------------|
| Reassured | <input type="checkbox"/> |
| Relieved  | <input type="checkbox"/> |
| Guilty    | <input type="checkbox"/> |
| Worried   | <input type="checkbox"/> |
| Upset     | <input type="checkbox"/> |
| Surprised | <input type="checkbox"/> |

Other comments: .....

**14) If you were aware of your results at the end of the trial and they were negative/normal, how confident were you with the safety of these results?**

- Very unconfident
- Somewhat unconfident
- Neutral
- Somewhat confident
- Very confident
- Didn't know my results
- Not applicable/results were positive

Next we would like to ask about your thoughts about the possibility of women collecting their own sample for HPV testing for cervical cancer screening by inserting a soft Q-tip or brush into the vagina that can then be returned to the laboratory and tested for the presence of HPV. With self-collection, a woman would not need to see a health care provider for pelvic exam for sample collection. Self-collected specimens tested for HPV have been shown to be equivalent to HPV samples taken by a health care provider for detecting abnormalities of the cervix.

**15) Please rate the following statements regarding self-collected samples:**

**Collecting my own sample for cervical cancer screening would be:**

|                   | <---                     | <--                      | <-                       | Neutral                  | ->                       | -->                      | --->                     |                |
|-------------------|--------------------------|--------------------------|--------------------------|--------------------------|--------------------------|--------------------------|--------------------------|----------------|
| Accurate          | <input type="checkbox"/> | Inaccurate     |
| Safe              | <input type="checkbox"/> | Unsafe         |
| Protect my health | <input type="checkbox"/> | Harm my health |
| Acceptable        | <input type="checkbox"/> | Unacceptable   |

**16) I would be willing to collect my own sample/specimen for cervical cancer screening:**

- Strongly Disagree
- Disagree
- Neutral
- Agree
- Strongly agree
- Don't know

Comments: .....

.....

1  
2  
3 Finally we'd like to ask some questions that may help us better understand associations between HPV  
4 and various other factors.  
5  
6

7 **17) What is the highest level of education you have achieved?**  
8

- 9  
10  No formal education  
11  Some elementary school  
12  Completed elementary school  
13  Some high school  
14  Completed high school  
15  Some post-secondary training (Trades, college, university)  
16  Completed trade/vocational/apprenticeship program  
17  Completed college  
18  Completed university (bachelor degree)  
19  Completed university (master degree or higher)  
20  
21  
22  
23  
24  
25

26  
27 **18) Please indicate your current marital status:**  
28

- 29  Single (living WITHOUT a partner)  
30  
31  Single (living WITH a partner)  
32  
33  Married or common law  
34  
35  Divorced  
36  
37  Separated (but still legally married)  
38  
39  Widowed  
40  
41

42  
43 **19) Not including new partners you have had since you completed the HPV FOCAL study, please**  
44 **indicate to the best of your recollection, how many male partners you have had vaginal**  
45 **intercourse with:**  
46

- 47  0  
48  1-10  
49  11-49  
50  50+  
51  
52  
53  
54  
55

56 CTRL IA Exit Survey 12June2017  
57

20) Please enter the total years you have used the following hormonal birth control methods. If never used, please enter "0".

| Method                                             | Total years used | Please place a checkmark in this column if you used this method while participating in the HPV FOCAL study |
|----------------------------------------------------|------------------|------------------------------------------------------------------------------------------------------------|
| Oral contraceptive pill                            | --               | <input type="checkbox"/>                                                                                   |
| Contraceptive patch                                | --               | <input type="checkbox"/>                                                                                   |
| Contraceptive vaginal ring                         | --               | <input type="checkbox"/>                                                                                   |
| Hormonal IUD                                       | --               | <input type="checkbox"/>                                                                                   |
| Injection (ie: Depo-provera)                       | --               | <input type="checkbox"/>                                                                                   |
| Morning after pill or emergency contraceptive pill | --               | <input type="checkbox"/>                                                                                   |
| Implant                                            | --               | <input type="checkbox"/>                                                                                   |

We are trying to better understand how use of specific substances (ie: alcohol, tobacco and marijuana) impacts a woman's potential to develop a long term HPV infection. These following questions help us determine if there is an association between HPV infection and different substances.

21) Have you ever smoked cigarettes?

- Yes (daily). For approximately how many years: \_\_
- Yes (less than daily)
- Not at all

22) Were you a regular cigarette smoker during your participation in the HPV FOCAL Study?

- Every day.....Approximately how many cigarettes did you smoke per day? \_\_
- Some days...Approximately how many days did you smoke each week? \_\_
- Not at all

CTRL IA Exit Survey 12June2017

1  
2  
3  
4 **23) During your participation in the HPV FOCAL Study, how often did you use marijuana:**  
5

- 6  
7  Never  
8  Less than once a month  
9  1-3 times a month  
10  Once a week  
11  More than once a week  
12  Every day  
13  
14  
15  
16

17 **24) Please indicate the ways you used marijuana during the HPV FOCAL study:**  
18

- 19  Smoking  
20  Vaporizing  
21  Edible (ie: cakes, cookies, candy, drinks, etc)  
22  Pill/capsule  
23  Other  
24  
25  
26  
27

28 **25) During your participation in the HPV FOCAL Study, how often did you drink alcoholic beverages?**  
29

- 30  
31  Never  
32  Once a month or less  
33  2-3 times a month  
34  Once a week  
35  2-3 times a week  
36  4-6 times a week  
37  Every day  
38  
39  
40  
41  
42  
43  
44  
45  
46  
47  
48  
49  
50  
51  
52  
53  
54  
55

56 CTRL IA Exit Survey 12June2017  
57  
58  
59  
60



1  
2 **26) Please estimate your total household income (everyone in your household, excluding**  
3 **roommates):**  
4

- 5  Less than \$10,000  
6  
7  \$10,001-25,000  
8  
9  \$25,001-50,000  
10  
11  \$50,001-75,000  
12  
13  \$75,001-100,000  
14  
15  More than \$100,000

16 Thank you for completing this survey! Your responses are highly valued and impact guidelines and  
17 recommendations as the province of British Columbia considers changes to cervical cancer screening  
18 practices.  
19  
20  
21  
22  
23  
24  
25  
26  
27  
28  
29  
30  
31  
32  
33  
34  
35  
36  
37  
38  
39  
40  
41  
42  
43  
44  
45  
46  
47  
48  
49  
50  
51  
52  
53  
54  
55

56 CTRL IA Exit Survey 12June2017  
57  
58  
59  
60

STROBE Statement—Checklist of items that should be included in reports of *cross-sectional studies*

|                              | Item No | Recommendation                                                                                                                                                                                               | Page No |
|------------------------------|---------|--------------------------------------------------------------------------------------------------------------------------------------------------------------------------------------------------------------|---------|
| <b>Title and abstract</b>    | 1       | (a) Indicate the study's design with a commonly used term in the title or the abstract                                                                                                                       | 1       |
|                              |         | (b) Provide in the abstract an informative and balanced summary of what was done and what was found                                                                                                          | 2       |
| <b>Introduction</b>          |         |                                                                                                                                                                                                              |         |
| Background/rationale         | 2       | Explain the scientific background and rationale for the investigation being reported                                                                                                                         | 4       |
| Objectives                   | 3       | State specific objectives, including any prespecified hypotheses                                                                                                                                             | 4       |
| <b>Methods</b>               |         |                                                                                                                                                                                                              |         |
| Study design                 | 4       | Present key elements of study design early in the paper                                                                                                                                                      | 6       |
| Setting                      | 5       | Describe the setting, locations, and relevant dates, including periods of recruitment, exposure, follow-up, and data collection                                                                              | 6       |
| Participants                 | 6       | (a) Give the eligibility criteria, and the sources and methods of selection of participants                                                                                                                  | 6       |
| Variables                    | 7       | Clearly define all outcomes, exposures, predictors, potential confounders, and effect modifiers. Give diagnostic criteria, if applicable                                                                     | NA      |
| Data sources/<br>measurement | 8*      | For each variable of interest, give sources of data and details of methods of assessment (measurement). Describe comparability of assessment methods if there is more than one group                         | 6,7     |
| Bias                         | 9       | Describe any efforts to address potential sources of bias                                                                                                                                                    | 6-8     |
| Study size                   | 10      | Explain how the study size was arrived at                                                                                                                                                                    | 7-8     |
| Quantitative variables       | 11      | Explain how quantitative variables were handled in the analyses. If applicable, describe which groupings were chosen and why                                                                                 | 6-8     |
| Statistical methods          | 12      | (a) Describe all statistical methods, including those used to control for confounding                                                                                                                        | 8       |
|                              |         | (b) Describe any methods used to examine subgroups and interactions                                                                                                                                          | 8       |
|                              |         | (c) Explain how missing data were addressed                                                                                                                                                                  | 8       |
|                              |         | (d) If applicable, describe analytical methods taking account of sampling strategy                                                                                                                           | 8       |
|                              |         | (e) Describe any sensitivity analyses                                                                                                                                                                        | 8       |
| <b>Results</b>               |         |                                                                                                                                                                                                              |         |
| Participants                 | 13*     | (a) Report numbers of individuals at each stage of study—eg numbers potentially eligible, examined for eligibility, confirmed eligible, included in the study, completing follow-up, and analysed            | 9       |
|                              |         | (b) Give reasons for non-participation at each stage                                                                                                                                                         | 9       |
|                              |         | (c) Consider use of a flow diagram                                                                                                                                                                           | 17      |
| Descriptive data             | 14*     | (a) Give characteristics of study participants (eg demographic, clinical, social) and information on exposures and potential confounders                                                                     | 9       |
|                              |         | (b) Indicate number of participants with missing data for each variable of interest                                                                                                                          | 9, 18   |
| Outcome data                 | 15*     | Report numbers of outcome events or summary measures                                                                                                                                                         | 18      |
| Main results                 | 16      | (a) Give unadjusted estimates and, if applicable, confounder-adjusted estimates and their precision (eg, 95% confidence interval). Make clear which confounders were adjusted for and why they were included | 18      |

|                          |    |                                                                                                                                                                            |       |
|--------------------------|----|----------------------------------------------------------------------------------------------------------------------------------------------------------------------------|-------|
|                          |    | (b) Report category boundaries when continuous variables were categorized                                                                                                  | n/A   |
|                          |    | (c) If relevant, consider translating estimates of relative risk into absolute risk for a meaningful time period                                                           | n/a   |
| Other analyses           | 17 | Report other analyses done—eg analyses of subgroups and interactions, and sensitivity analyses                                                                             | 9-11  |
| <b>Discussion</b>        |    |                                                                                                                                                                            |       |
| Key results              | 18 | Summarise key results with reference to study objectives                                                                                                                   | 12-15 |
| Limitations              | 19 | Discuss limitations of the study, taking into account sources of potential bias or imprecision. Discuss both direction and magnitude of any potential bias                 | 15-16 |
| Interpretation           | 20 | Give a cautious overall interpretation of results considering objectives, limitations, multiplicity of analyses, results from similar studies, and other relevant evidence | 16    |
| Generalisability         | 21 | Discuss the generalisability (external validity) of the study results                                                                                                      | 16    |
| <b>Other information</b> |    |                                                                                                                                                                            |       |
| Funding                  | 22 | Give the source of funding and the role of the funders for the present study and, if applicable, for the original study on which the present article is based              | 24    |

\*Give information separately for exposed and unexposed groups.

**Note:** An Explanation and Elaboration article discusses each checklist item and gives methodological background and published examples of transparent reporting. The STROBE checklist is best used in conjunction with this article (freely available on the Web sites of PLoS Medicine at <http://www.plosmedicine.org/>, Annals of Internal Medicine at <http://www.annals.org/>, and Epidemiology at <http://www.epidem.com/>). Information on the STROBE Initiative is available at [www.strobe-statement.org](http://www.strobe-statement.org).
