# Supplementary material for: Women’s acceptability of and experience with primary human papillomavirus testing for cervix screening: HPV FOCAL trial cross-sectional online survey results
Source: PubMed Central journal article supplement — BMJ Open. 2021 Oct 7;11(10):e052084. doi: 10.1136/bmjopen-2021-052084 (PMC8499254; doi:10.1136/bmjopen-2021-052084), 2021-10-07
Supplement: bmjopen-2021-052084supp001.pdf [file bmjopen-2021-052084supp001.pdf]

**Thank you for contributing to the HPV FOCAL Study! As you know the purpose of the study was to evaluate HPV testing for cervical cancer screening in BC. The results of the FOCAL study will be very important as Canadian programs consider adopting HPV testing to screen for changes that may lead to cervical cancer. We are interested to learn about your experience and understanding of HPV testing for cervical cancer screening. \*\*\*As a reminder, ALL women who completed a 4 year exit screen received both a Pap smear and an HPV test\*\*\***

**Your input is important to us and can help plan for the future of cervical cancer screening in BC. Please take a few moments of your time to complete the attached survey. You do not have to answer any questions you do not feel comfortable answering.**

---

First we would like to ask about your HPV knowledge before and during the study.

**1) Please rate the following question according to how much you agree or disagree with the statement:  
I know more about HPV and cervical cancer now than I did before I participated in the study:**

- Strongly Disagree
- Disagree
- Neutral
- Agree
- Strongly agree
- Not Sure

**2) I was aware of my cervical screen (Pap and HPV test) results at completion of the study:**

- No
- Yes
- Not sure

**3) Please rate the following question according to how much you agree or disagree with the statement:  
I had enough time to ask my health care provider questions about HPV testing and/or my results.**

- Strongly Disagree
- Disagree
- Neutral
- Agree
- Strongly agree
- Don't know
- Not applicable

CTRL IA Exit Survey 12June2017

- 4) Please rate the following question according to how much you agree or disagree with the statement:  
**I feel my health care provider was able to answer my questions about HPV:**

- Strongly Disagree  
 Disagree  
 Neutral  
 Agree  
 Strongly agree  
 Don't know  
 Not applicable

- 5) Please rate the following statements regarding HPV testing:

**Having my health care provider collect a sample for HPV testing for cervical cancer screening would be:**

|                   | <---                     | <--                      | <-                       | Neutral                  | ->                       | -->                      | --->                     |                |
|-------------------|--------------------------|--------------------------|--------------------------|--------------------------|--------------------------|--------------------------|--------------------------|----------------|
| Accurate          | <input type="checkbox"/> | Inaccurate     |
| Safe              | <input type="checkbox"/> | Unsafe         |
| Protect my health | <input type="checkbox"/> | Harm my health |
| Acceptable        | <input type="checkbox"/> | Unacceptable   |

CTRL IA Exit Survey 12June2017

**6) Which of the following have been important sources of information for you about HPV/HPV testing?**

|                                                                                                                         | <b>Not at all important</b> | <b>Not that important</b> | <b>Neutral</b>           | <b>Somewhat important</b> | <b>Very important</b>    |
|-------------------------------------------------------------------------------------------------------------------------|-----------------------------|---------------------------|--------------------------|---------------------------|--------------------------|
| My health care provider                                                                                                 | <input type="checkbox"/>    | <input type="checkbox"/>  | <input type="checkbox"/> | <input type="checkbox"/>  | <input type="checkbox"/> |
| BC Cancer Agency (including the BC Cancer Agency website)                                                               | <input type="checkbox"/>    | <input type="checkbox"/>  | <input type="checkbox"/> | <input type="checkbox"/>  | <input type="checkbox"/> |
| Government websites (ie: Canadian Cancer Society, Health Canada, Public Health Agency of Canada, BC Ministry of Health) | <input type="checkbox"/>    | <input type="checkbox"/>  | <input type="checkbox"/> | <input type="checkbox"/>  | <input type="checkbox"/> |
| Other websites (ie: WebMD, blogs, etc)                                                                                  | <input type="checkbox"/>    | <input type="checkbox"/>  | <input type="checkbox"/> | <input type="checkbox"/>  | <input type="checkbox"/> |
| Friends/family                                                                                                          | <input type="checkbox"/>    | <input type="checkbox"/>  | <input type="checkbox"/> | <input type="checkbox"/>  | <input type="checkbox"/> |
| Social Media (ie: facebook, twitter, etc)                                                                               | <input type="checkbox"/>    | <input type="checkbox"/>  | <input type="checkbox"/> | <input type="checkbox"/>  | <input type="checkbox"/> |

Other comments:.....

.....

CTRL IA Exit Survey 12June2017

Next we would like to ask how you feel about HPV testing to screen for cervical cancer.

*As a reminder, there are over 100 types of the human papillomavirus (HPV), of which about 40 affect the genital region. HPV is very common and most sexually active people will have an infection at some point in their lives, however it usually disappears without a person experiencing any symptoms. Only in cases where a cancer causing HPV type persists for many years, is there a risk that it may lead to cervical cancer.*

7) Please rate the following question according to how much you agree or disagree with the statement:

**Having an HPV test to screen for cervical cancer instead of a Pap smear is acceptable to me:**

- Strongly Disagree
- Disagree
- Neutral
- Agree
- Strongly agree
- Don't know

Comments:.....

8) I would be willing to have an HPV test every 4 or 5 years instead of a Pap test every 3 years:

- Strongly Disagree
- Disagree
- Neutral
- Agree
- Strongly agree
- Don't know

Comments: .....

CTRL IA Exit Survey 12June2017

Evidence suggests that HPV testing is ideally started no earlier than 30 years of age. Should HPV testing be adopted in the province, it would be available for women starting at age 30 or 35. However, cervical cancer screening could still start at age 25 using the Pap smear as currently recommended in BC.

**9) Receiving HPV testing for cervical cancer screening, starting at age 30 is acceptable to me.**

- Strongly Disagree
- Disagree
- Neutral
- Agree
- Strongly agree
- Don't know

**10) If cervical cancer screening was to occur every 4 or 5 years, instead of every 3 years, I would be less likely to visit my health care provider for other health reasons.**

- Strongly Disagree
- Disagree
- Neutral
- Agree
- Strongly agree
- Don't know

Next we would like to understand some of your thoughts about HPV testing compared to the Pap test.

**11) What would concern you most: 1) being told you had "abnormal Pap test results" or 2) being told you were "positive for HPV"? (Check ONE only)**

- Neither would concern me
- Being told I have abnormal Pap test results
- Being told I have HPV
- Both would concern me equally

Please explain: .....

.....

CTRL IA Exit Survey 12June2017

Next, we would like to learn about your experience of receiving HPV results.

**12) If you tested HPV positive during the HPV FOCAL trial, or if you were to test positive for HPV, please rate your level of agreement with the following statements:**

|                                                                                                                                                       | Strongly disagree        | Disagree                 | Neutral/uncertain        | Agree                    | Strongly Agree           |
|-------------------------------------------------------------------------------------------------------------------------------------------------------|--------------------------|--------------------------|--------------------------|--------------------------|--------------------------|
| Although HPV is sexually acquired, having an infection that is sexually acquired does not concern me any differently than abnormal Pap results would. | <input type="checkbox"/> |
| It would be important for me to know who gave me HPV.                                                                                                 | <input type="checkbox"/> |
| It would be important to me to determine when I got HPV.                                                                                              | <input type="checkbox"/> |
| I think people might judge me for having HPV.                                                                                                         | <input type="checkbox"/> |
| I would feel comfortable telling my partner about my HPV positive result.                                                                             | <input type="checkbox"/> |
| I would not be concerned about transmitting HPV to a sexual partner.                                                                                  | <input type="checkbox"/> |
| Receiving a positive HPV result would not affect my relationship with my sexual partner.                                                              | <input type="checkbox"/> |
| Having HPV would not cause me any concern about developing cervical cancer.                                                                           | <input type="checkbox"/> |
| I would feel confident in the follow up and/or treatment my provider would recommend for my positive HPV result.                                      | <input type="checkbox"/> |

CTRL IA Exit Survey 12June2017

Other comments:.....  
 .....

**13) Please rate the following statements according to how much you agree or disagree:**

**If I tested positive for HPV I felt/would feel:**

|           | <b>Strongly disagree</b> | <b>Disagree</b>          | <b>Neutral/uncertain</b> | <b>Agree</b>             | <b>Strongly agree</b>    |
|-----------|--------------------------|--------------------------|--------------------------|--------------------------|--------------------------|
| Reassured | <input type="checkbox"/> |
| Relieved  | <input type="checkbox"/> |
| Guilty    | <input type="checkbox"/> |
| Worried   | <input type="checkbox"/> |
| Upset     | <input type="checkbox"/> |
| Surprised | <input type="checkbox"/> |

Other comments: .....

**14) If you were aware of your results at the end of the trial and they were negative/normal, how confident were you with the safety of these results?**

- Very unconfident
- Somewhat unconfident
- Neutral
- Somewhat confident
- Very confident
- Didn't know my results
- Not applicable/results were positive

CTRL IA Exit Survey 12June2017

Next we would like to ask about your thoughts about the possibility of women collecting their own sample for HPV testing for cervical cancer screening by inserting a soft Q-tip or brush into the vagina that can then be returned to the laboratory and tested for the presence of HPV. With self-collection, a woman would not need to see a health care provider for pelvic exam for sample collection. Self-collected specimens tested for HPV have been shown to be equivalent to HPV samples taken by a health care provider for detecting abnormalities of the cervix.

**15) Please rate the following statements regarding self-collected samples:**

**Collecting my own sample for cervical cancer screening would be:**

|                   | <---                     | <--                      | <-                       | Neutral                  | ->                       | -->                      | --->                     |                |
|-------------------|--------------------------|--------------------------|--------------------------|--------------------------|--------------------------|--------------------------|--------------------------|----------------|
| Accurate          | <input type="checkbox"/> | Inaccurate     |
| Safe              | <input type="checkbox"/> | Unsafe         |
| Protect my health | <input type="checkbox"/> | Harm my health |
| Acceptable        | <input type="checkbox"/> | Unacceptable   |

**16) I would be willing to collect my own sample/specimen for cervical cancer screening:**

- Strongly Disagree
- Disagree
- Neutral
- Agree
- Strongly agree
- Don't know

Comments: .....

.....

CTRL IA Exit Survey 12June2017



Finally we'd like to ask some questions that may help us better understand associations between HPV and various other factors.

**17) What is the highest level of education you have achieved?**

- No formal education
- Some elementary school
- Completed elementary school
- Some high school
- Completed high school
- Some post-secondary training (Trades, college, university)
- Completed trade/vocational/apprenticeship program
- Completed college
- Completed university (bachelor degree)
- Completed university (master degree or higher)

**18) Please indicate your current marital status:**

- Single (living WITHOUT a partner)
- Single (living WITH a partner)
- Married or common law
- Divorced
- Separated (but still legally married)
- Widowed

**19) Not including new partners you have had since you completed the HPV FOCAL study, please indicate to the best of your recollection, how many male partners you have had vaginal intercourse with:**

- 0
- 1-10
- 11-49
- 50+

CTRL IA Exit Survey 12June2017

**20) Please enter the total years you have used the following hormonal birth control methods. If never used, please enter "0".**

| Method                                             | Total years used | Please place a checkmark in this column if you used this method while participating in the HPV FOCAL study |
|----------------------------------------------------|------------------|------------------------------------------------------------------------------------------------------------|
| Oral contraceptive pill                            | --               | <input type="checkbox"/>                                                                                   |
| Contraceptive patch                                | --               | <input type="checkbox"/>                                                                                   |
| Contraceptive vaginal ring                         | --               | <input type="checkbox"/>                                                                                   |
| Hormonal IUD                                       | --               | <input type="checkbox"/>                                                                                   |
| Injection (ie: Depo-provera)                       | --               | <input type="checkbox"/>                                                                                   |
| Morning after pill or emergency contraceptive pill | --               | <input type="checkbox"/>                                                                                   |
| Implant                                            | --               | <input type="checkbox"/>                                                                                   |

We are trying to better understand how use of specific substances (ie: alcohol, tobacco and marijuana) impacts a woman's potential to develop a long term HPV infection. These following questions help us determine if there is an association between HPV infection and different substances.

**21) Have you ever smoked cigarettes?**

- Yes (daily). For approximately how many years: \_\_
- Yes (less than daily)
- Not at all

**22) Were you a regular cigarette smoker during your participation in the HPV FOCAL Study?**

- Every day....Approximately how many cigarettes did you smoke per day? \_\_
- Some days...Approximately how many days did you smoke each week? \_\_
- Not at all

CTRL IA Exit Survey 12June2017

**23) During your participation in the HPV FOCAL Study, how often did you use marijuana:**

- Never
- Less than once a month
- 1-3 times a month
- Once a week
- More than once a week
- Every day

**24) Please indicate the ways you used marijuana during the HPV FOCAL study:**

- Smoking
- Vaporizing
- Edible (ie: cakes, cookies, candy, drinks, etc)
- Pill/capsule
- Other

**25) During your participation in the HPV FOCAL Study, how often did you drink alcoholic beverages?**

- Never
- Once a month or less
- 2-3 times a month
- Once a week
- 2-3 times a week
- 4-6 times a week
- Every day

CTRL IA Exit Survey 12June2017

**26) Please estimate your total household income (everyone in your household, excluding roommates):**

- Less than \$10,000
- \$10,001-25,000
- \$25,001-50,000
- \$50,001-75,000
- \$75,001-100,000
- More than \$100,000

Thank you for completing this survey! Your responses are highly valued and impact guidelines and recommendations as the province of British Columbia considers changes to cervical cancer screening practices.

CTRL IA Exit Survey 12June2017
